# Supplementary material for: Evaluating the performance of large language &amp; visual-language models in cervical cytology screening
Source: Research Square preprint supplement (doi:10.21203/rs.3.rs-5849716/v1), 2025-04-15
Supplement: Supplementary file 1 [file 03d44b4fe7e638fed317c3e2.xlsx]

## Sheet: Fig.4a
Model	Expert 1	Expert 2	Expert 3
GPT-4	6.63202	6.83427	7.21067
Bard	6.02247	6.0927	6.43539
Claude-2.0	6.32584	6.57303	6.91573
LLaMa-2	5.38483	5.78933	6.12921
ERINE-Bot -4.0	5.57303	5.74438	6.1573
Qwen-Max	6.19382	6.5927	6.80337

## Sheet: Fig.4b
	Expert 1	Expert 2	Expert 3
GPT-4	270	262	239
Bard	221	174	161
Claude-2.0	238	216	215
LLaMa-2	187	129	135
ERINE-Bot-4.0	203	155	163
Qwen-Max	225	198	196

## Sheet: Fig.4c
	Select By 1 Expert	Select By 2 Experts	Select By 3 Experts
GPT-4	59	134	148
Bard	104	118	72
Claude-2.0	101	122	108
LLaMa-2	115	108	40
ERINE-Bot-4.0	118	95	71
Qwen-Max	107	139	78

## Sheet: Fig.4d
	1	2	3
1	1	0.605337	0.610795
2	0.605337	1	0.545024
3	0.610795	0.545024	1

## Sheet: Fig.4e
	Mean	Std	Q1	Q3
GPT-4	0.369888	0.232644	0.2	0.5225
Bard	0.314171	0.222213	0.16	0.4
Claude-2.0	0.374831	0.228664	0.2	0.5025
LLaMa-2	0.221264	0.185529	0.1	0.25
ERINE-Bot-4.0	0.299185	0.22169	0.15	0.4
Qwen-Max	0.360281	0.209169	0.2	0.5

## Sheet: Experts Evaluation Score
GPT-4-Expert 1	Bard-Expert 1	Claude-2.0-Expert 1	LLaMa-2-Expert 1	ERINE-Bot-4.0-Expert 1	Qwen-Max-Expert 1	GPT-4-Expert 2	Bard-Expert 2	Claude-2.0-Expert 2	LLaMa-2-Expert 2	ERINE-Bot-4.0-Expert 2	Qwen-Max-Expert 2	GPT-4-Expert 3	Bard-Expert 3	Claude-2.0-Expert 3	LLaMa-2-Expert 3	ERINE-Bot-4.0-Expert 3	Qwen-Max-Expert 3
8	8	8	9	8	8	7	0	0	8	9	4	7	7	8	7	8	7
9	9	9	8	10	9	7	7	9	7	9	8	7	7	8	6	9	7
8	8	8	7	8	8	8	8	8	6	9	8	8	7	9	8	9	10
5	0	4	4	5	6	6	0	4	4	7	6	6	7	7	7	8	7
0	0	5	0	0	0	5	0	5	0	0	0	7	6	8	8	4	5
9	4	8	3	9	2	5	5	5	2	7	4	8	8	8	8	8	7
6	6	7	6	7	10	8	0	8	5	5	5	7	7	8	8	7	9
7	7	7	7	7	7	8	8	8	8	7	8	7	7	8	8	8	7
7	7	8	8	7	8	8	8	9	8	9	8	8	7	8	9	7	8
2	2	8	5	5	5	8	0	5	4	3	2	7	5	9	6	7	7
7	0	8	0	0	8	0	6	8	7	0	6	7	8	8	7	8	8
8	0	8	1	8	8	7	7	7	0	7	8	8	8	9	6	10	9
0	0	0	0	0	0	7	5	6	4	6	5	6	7	8	8	8	9
7	7	7	7	6	7	7	6	8	6	5	7	7	8	7	8	7	8
8	9	8	0	7	8	6	6	4	0	0	0	7	7	6	0	7	8
5	5	8	0	8	8	4	4	7	5	8	8	7	2	8	6	7	8
8	8	8	8	8	8	8	8	7	6	5	6	8	7	8	7	5	8
9	9	9	8	7	10	7	7	8	3	8	8	6	8	8	6	8	9
5	0	5	5	10	5	4	4	5	6	7	8	6	6	8	7	8	7
7	7	0	7	7	7	8	4	4	3	6	7	7	6	6	8	9	7
7	9	8	8	7	7	7	8	8	7	5	7	8	8	8	7	7	8
8	7	7	7	0	8	7	7	7	0	0	7	7	7	7	8	9	9
0	7	7	3	7	9	8	4	6	6	7	8	8	8	8	8	8	8
8	8	8	5	6	6	7	8	8	8	8	8	8	8	8	8	8	7
8	2	8	8	8	2	8	7	8	8	7	7	8	6	8	7	8	8
7	3	7	3	7	3	8	7	8	7	8	7	7	8	8	8	8	8
9	3	9	0	9	9	8	7	8	6	8	7	8	7	8	7	8	8
7	7	7	7	7	7	8	8	5	5	6	7	8	8	8	8	7	8
7	7	7	7	7	7	8	8	8	6	8	8	8	7	8	9	8	8
7	7	7	5	7	7	4	4	8	4	8	8	7	8	8	8	8	8
8	8	8	8	8	8	7	6	8	7	7	7	8	6	8	8	8	6
8	7	7	7	8	7	9	5	5	7	8	6	8	6	8	7	8	6
5	5	5	5	5	5	8	7	6	3	8	8	8	8	7	8	8	8
7	7	7	7	5	7	7	5	5	5	4	7	8	8	8	8	5	7
7	7	7	7	0	7	8	6	7	4	0	7	8	7	8	8	8	9
7	7	0	0	0	0	5	0	6	0	7	5	8	7	6	6	6	7
7	7	7	6	7	8	7	0	8	5	1	7	8	7	8	8	6	8
8	7	8	0	1	6	8	0	6	6	4	4	8	7	8	5	5	8
8	7	7	7	7	7	8	8	7	6	7	6	8	8	8	7	8	8
7	7	7	7	7	7	8	8	7	6	5	5	8	8	8	8	8	9
7	7	7	0	7	7	8	5	6	6	7	7	8	8	8	6	8	8
7	7	7	7	2	6	6	6	6	6	7	7	7	7	7	6	8	8
7	7	7	8	7	7	5	6	7	6	7	6	8	8	8	7	7	8
8	0	8	8	8	8	5	3	6	7	6	7	8	7	7	6	7	8
7	7	6	5	7	8	7	5	4	5	6	6	8	8	8	8	8	8
7	7	7	7	7	7	5	7	4	4	5	6	8	7	8	8	8	8
7	7	5	0	4	3	6	5	6	6	6	7	8	8	8	6	8	8
7	7	7	7	7	7	7	7	7	2	5	7	8	8	7	7	8	7
7	8	7	7	7	7	8	7	8	7	7	7	8	8	8	7	8	8
8	7	7	7	6	7	8	8	7	7	7	7	8	8	7	7	8	8
7	7	7	0	0	0	7	7	7	6	6	6	8	8	7	6	8	8
7	7	7	7	7	7	7	7	6	5	7	8	8	8	8	8	8	8
8	8	8	0	8	8	7	5	7	5	6	6	7	8	8	7	8	8
7	7	7	7	7	7	7	7	7	7	7	7	8	7	8	7	8	9
8	8	8	8	8	8	7	7	7	7	1	6	8	7	7	7	7	8
8	7	7	7	7	8	8	8	8	8	0	8	7	7	8	7	7	9
7	7	7	7	7	7	7	7	7	7	7	7	8	8	8	5	8	6
7	7	7	7	7	7	7	4	7	6	6	6	7	7	8	8	9	8
8	8	8	6	8	8	5	7	7	6	6	6	7	7	8	8	7	8
7	7	0	8	7	7	6	6	0	5	7	7	7	7	5	7	6	8
8	8	8	8	0	4	7	7	8	7	0	5	8	8	9	7	8	7
7	7	6	7	7	6	6	7	4	6	6	0	6	6	4	6	6	4
7	7	7	7	7	7	7	7	7	6	6	6	8	8	8	8	8	9
7	0	7	7	7	7	7	7	7	7	7	7	6	7	7	8	8	8
7	7	7	4	7	7	4	6	7	5	6	7	7	7	7	7	9	8
7	7	7	7	7	7	8	5	6	5	5	7	7	7	6	6	7	8
7	7	7	7	7	7	2	2	7	7	7	7	7	7	7	7	7	7
7	7	7	7	7	7	8	7	7	7	7	7	7	7	7	8	8	8
5	5	5	7	7	0	5	5	5	6	4	6	7	7	7	7	6	7
6	6	6	6	6	6	5	6	6	7	0	7	7	7	7	7	7	7
7	7	7	7	7	7	7	6	5	5	6	7	8	7	7	7	7	7
7	7	7	7	7	7	7	6	7	5	7	7	6	6	6	7	7	8
7	7	7	7	0	7	7	7	6	6	6	6	7	8	7	8	6	8
5	5	5	5	4	6	7	6	7	6	2	6	8	7	7	7	6	8
7	7	7	7	7	7	7	7	7	7	0	6	7	7	7	7	7	7
7	7	7	7	7	7	7	7	7	6	6	7	6	8	6	8	7	8
7	7	7	7	0	7	7	5	6	6	5	6	8	8	8	8	7	8
7	7	7	7	0	7	7	6	6	6	0	6	8	8	8	7	8	8
7	7	7	7	7	7	7	8	8	4	6	7	8	8	8	6	7	8
7	7	7	7	7	7	7	6	7	5	6	6	8	8	8	7	8	7
7	7	7	7	7	7	7	7	7	6	0	6	7	7	8	7	7	7
7	7	7	7	7	7	8	7	7	7	7	6	8	7	8	7	8	8
7	7	7	7	7	7	7	7	7	7	7	6	8	7	8	8	7	8
7	7	7	7	7	7	8	8	8	6	7	7	7	7	8	8	8	8
7	7	7	7	7	7	8	7	7	7	7	7	8	6	8	8	8	7
7	7	7	7	7	7	7	8	7	7	7	7	8	7	8	8	8	7
7	7	7	7	0	7	7	7	7	7	0	7	8	6	8	8	5	8
0	0	0	0	0	0	8	7	7	6	6	7	8	5	7	8	6	8
7	7	7	7	7	7	7	8	8	6	7	7	8	7	8	8	8	8
7	7	7	7	7	7	7	0	0	0	7	4	8	2	6	6	6	6
7	7	7	7	7	7	8	8	8	8	8	8	8	8	8	8	8	8
7	7	7	7	7	7	8	8	8	7	8	8	8	8	8	8	8	7
7	7	7	7	7	7	8	8	8	8	8	8	8	8	8	7	8	8
7	7	7	7	7	3	5	8	5	7	8	5	8	8	8	8	8	7
7	7	7	7	7	7	8	8	8	7	7	7	8	8	8	8	8	8
7	7	7	7	7	7	8	8	8	8	8	8	7	7	7	7	8	8
0	5	6	4	5	5	7	7	7	7	7	7	7	8	8	6	7	7
7	7	7	6	7	6	7	7	7	7	7	7	7	8	8	8	8	8
0	0	0	0	7	3	7	7	7	4	7	7	8	7	8	5	8	8
0	0	0	0	0	0	8	7	7	7	4	7	8	7	8	7	6	7
0	0	0	0	0	0	8	6	7	4	7	7	8	7	7	7	7	7
0	7	0	0	0	0	5	4	5	6	5	7	8	7	8	8	7	7
7	7	7	6	7	7	7	7	5	5	7	5	7	8	6	6	6	6
0	0	0	0	7	7	4	4	7	7	7	7	8	7	7	8	8	8
7	6	6	6	6	7	5	7	7	7	7	7	6	7	8	6	7	6
5	5	5	5	5	9	7	7	7	6	5	7	7	7	7	8	6	6
7	7	5	5	5	8	8	8	8	6	0	6	7	7	7	7	7	7
4	5	7	7	7	7	7	6	7	7	7	7	8	6	8	7	6	8
7	7	7	7	7	7	5	6	6	6	7	7	7	7	7	6	7	7
7	7	7	7	7	7	8	8	7	0	8	8	8	6	8	7	8	8
7	7	7	7	7	7	7	7	7	7	7	7	8	8	8	8	8	8
7	7	7	7	8	7	3	0	4	5	6	7	7	6	7	7	7	7
4	4	4	4	5	0	7	7	7	7	7	7	7	7	7	7	7	6
5	5	5	1	7	6	7	7	7	7	7	7	7	7	7	8	8	7
7	6	7	7	8	7	7	4	7	5	5	5	5	6	7	6	7	6
6	7	7	7	7	7	6	6	4	6	6	7	7	7	7	7	8	8
6	5	7	2	8	5	7	7	7	4	4	7	7	6	7	6	7	7
7	7	7	7	7	7	6	6	6	6	6	6	6	6	6	6	7	7
7	7	7	7	7	7	4	5	5	4	4	6	7	7	7	7	7	7
7	7	7	7	7	7	5	5	5	6	6	6	6	7	7	7	7	7
7	7	7	7	7	7	7	7	7	7	7	7	7	7	7	7	7	6
8	8	8	8	8	8	7	7	7	7	7	7	7	7	7	7	6	7
8	8	8	8	0	8	7	7	7	7	6	7	8	8	8	8	6	8
8	8	8	8	8	8	7	7	7	6	7	7	7	7	7	7	7	8
8	8	8	8	8	8	8	8	8	6	8	8	6	7	7	7	7	7
8	8	8	8	8	8	7	7	7	5	7	8	7	7	7	6	7	7
8	8	8	8	8	8	7	7	7	7	7	7	7	7	7	7	7	7
8	8	8	8	8	8	8	7	8	0	9	8	7	7	7	5	7	8
7	7	7	7	0	7	7	4	7	7	7	8	7	7	7	6	6	7
7	7	7	0	7	7	8	8	3	3	4	7	7	7	2	2	1	7
8	8	8	8	8	8	8	7	8	6	7	7	7	6	7	7	6	5
7	7	7	7	7	7	8	8	7	0	6	8	7	7	7	4	7	7
7	7	7	7	7	7	8	7	7	7	8	8	6	6	6	6	6	6
7	7	7	7	7	7	7	7	7	7	7	7	7	7	7	7	7	7
6	5	6	6	6	7	7	5	7	7	8	8	7	7	6	6	6	6
7	7	7	7	7	7	7	7	7	6	6	6	7	7	8	5	7	8
7	7	7	0	0	0	7	7	7	7	7	7	7	7	7	7	7	6
7	7	7	7	7	7	7	8	8	8	7	6	8	7	6	6	6	6
7	6	7	7	7	7	7	6	7	7	7	7	8	6	6	6	7	4
7	7	7	7	7	7	7	7	7	7	7	7	7	6	6	6	7	6
1	7	7	1	1	1	8	7	7	6	6	7	6	7	6	6	6	6
7	7	7	7	7	7	8	8	8	8	8	8	7	7	7	7	7	7
8	8	8	0	9	8	8	8	7	7	8	7	7	7	7	4	6	5
7	5	8	7	7	7	8	5	5	7	7	7	7	6	8	8	8	7
7	7	0	7	7	7	7	7	7	7	7	7	7	8	3	3	7	7
7	0	7	7	7	7	7	7	7	7	7	8	7	7	8	7	7	7
7	6	7	6	6	6	7	7	7	7	7	7	7	7	7	5	8	7
7	7	7	7	0	7	8	8	8	8	0	8	7	7	7	6	3	7
7	7	7	7	0	7	8	8	8	7	6	5	7	7	7	3	7	7
7	5	7	4	0	7	7	6	7	6	5	7	8	7	7	6	2	6
7	7	0	7	7	7	8	7	6	6	7	7	7	6	0	7	7	7
7	7	7	7	7	7	7	7	7	7	7	7	7	7	7	1	7	7
7	7	7	7	7	7	8	8	7	7	7	7	8	7	6	6	7	6
7	7	7	7	7	7	7	6	6	6	7	7	8	6	6	6	8	7
7	7	7	7	7	7	6	6	6	6	5	7	7	7	6	6	3	7
7	7	8	5	3	7	7	7	7	6	7	8	7	7	7	6	7	7
7	7	7	0	6	8	7	7	7	0	7	7	7	5	7	2	8	8
7	7	7	5	7	7	8	8	8	7	7	7	7	7	7	2	7	8
7	7	7	6	7	0	7	7	8	6	7	8	3	7	3	7	3	0
7	7	7	7	7	7	7	7	7	7	7	8	7	7	7	7	7	7
7	7	7	6	4	0	8	8	7	7	7	7	8	7	7	6	6	2
7	7	4	0	4	7	7	7	6	5	7	7	8	8	0	0	5	8
4	6	6	4	0	7	7	7	7	7	0	6	6	8	8	8	0	7
7	7	7	3	0	7	7	7	7	7	4	7	8	7	8	8	0	8
7	7	6	7	3	3	5	7	5	7	5	5	8	8	2	8	2	8
0	0	0	0	0	0	7	7	6	6	7	7	2	2	2	6	8	6
7	7	7	7	7	5	7	7	7	7	7	7	8	8	8	8	8	8
7	7	7	7	6	7	6	6	6	6	8	7	8	8	8	0	0	8
7	2	2	2	1	7	8	6	6	5	6	6	7	7	7	1	7	8
7	7	7	5	5	8	8	6	8	5	4	7	8	6	8	7	2	8
7	7	5	7	0	7	6	7	7	7	2	7	7	6	7	8	0	7
6	6	6	6	6	6	7	7	7	7	0	7	7	7	6	6	0	6
7	7	6	7	5	5	8	8	7	7	6	7	7	7	7	7	7	7
5	5	5	5	5	5	7	6	7	7	6	7	8	8	8	8	8	8
5	5	5	5	5	5	8	6	6	0	0	9	8	7	6	6	2	7
7	5	3	5	5	5	8	7	7	7	7	7	7	3	7	3	5	7
5	3	5	7	7	5	8	7	7	7	7	7	7	5	7	4	5	6
7	7	7	7	7	7	7	7	7	7	7	6	7	3	6	2	7	2
7	7	7	7	7	7	8	8	8	8	7	7	8	8	8	8	8	8
7	7	6	6	6	6	8	7	7	6	6	6	7	5	7	7	7	7
5	4	5	5	5	5	6	5	6	7	7	7	6	6	6	5	8	6
5	5	5	5	5	5	6	7	7	7	7	5	8	4	6	6	6	7
7	7	7	7	7	7	8	8	8	4	5	7	8	8	8	5	8	8
7	5	5	4	4	6	8	7	8	7	7	6	8	7	8	8	8	6
5	5	5	5	7	7	8	8	8	7	8	7	8	8	9	0	7	3
7	7	7	7	7	7	8	7	7	6	7	7	7	7	8	3	3	8
7	0	7	6	5	5	7	7	7	7	6	7	8	8	8	4	8	8
7	7	7	0	7	7	7	7	8	7	6	6	8	8	8	4	0	7
7	6	7	5	5	5	7	8	8	8	7	7	7	7	7	5	6	6
7	7	7	0	0	7	6	6	6	6	0	7	7	7	4	6	2	6
10	7	7	7	7	7	8	8	7	7	7	7	7	7	7	7	1	8
7	1	0	7	7	4	8	8	8	8	8	8	7	2	2	6	7	3
7	7	7	7	7	7	7	7	8	7	7	7	7	7	7	7	7	7
7	7	7	7	7	7	7	7	7	7	7	7	8	6	7	5	6	6
7	7	0	7	7	5	7	7	6	6	6	7	7	7	6	7	6	3
7	0	7	4	7	7	7	7	7	5	7	7	7	3	7	7	5	5
7	7	7	0	7	7	6	6	6	6	7	7	7	7	7	4	7	7
7	7	7	7	7	7	8	6	6	0	5	7	8	4	7	1	8	7
7	7	7	7	7	7	8	7	7	0	7	6	7	7	7	5	5	7
7	7	7	7	7	7	8	7	8	7	7	7	7	7	7	7	7	7
7	3	7	3	7	7	8	5	8	5	7	7	8	4	8	6	8	8
7	7	7	7	7	7	7	4	5	4	5	6	8	1	5	2	5	4
3	3	3	3	5	7	7	7	7	7	7	7	7	3	7	6	8	4
7	5	5	5	5	7	8	6	7	7	4	6	8	7	6	0	6	6
8	1	8	1	8	8	7	0	7	6	6	6	8	6	7	7	7	7
8	8	8	0	0	0	7	7	7	4	4	7	8	8	8	5	0	7
8	8	8	0	0	0	7	6	6	6	0	7	8	8	8	4	0	6
8	0	7	7	6	8	7	0	7	0	7	7	8	1	8	0	4	7
7	7	7	0	7	7	7	7	7	0	7	7	8	8	8	3	3	7
7	7	7	7	0	7	7	7	7	7	6	7	7	7	7	7	2	6
7	3	7	5	8	7	8	7	7	7	6	7	8	6	8	6	2	8
7	7	7	6	7	7	7	7	7	7	7	7	7	7	7	7	4	5
10	0	5	5	5	8	7	7	7	7	7	7	6	6	6	6	8	7
9	5	5	6	6	7	7	7	7	7	7	7	7	6	6	7	2	7
7	6	8	0	8	6	7	7	7	0	5	7	7	6	7	6	6	7
8	3	8	6	0	6	7	7	7	0	0	7	8	7	8	6	0	7
7	0	7	2	5	4	7	0	0	7	7	7	7	6	7	6	7	8
7	7	7	7	8	7	7	6	7	5	7	7	8	8	8	7	8	7
5	5	5	6	4	5	5	5	5	5	5	5	7	7	7	6	7	8
1	5	0	8	3	8	4	5	5	6	7	6	3	2	0	8	6	8
8	8	8	8	8	8	7	7	7	7	7	7	7	2	7	7	7	7
8	8	8	7	9	7	7	6	7	7	7	7	8	8	8	6	8	7
7	7	7	8	8	7	7	7	7	6	7	6	8	7	8	8	8	8
8	8	8	8	8	5	7	7	7	7	7	7	8	7	7	1	6	0
7	7	7	0	7	6	6	7	7	6	5	6	4	3	5	4	6	7
0	0	0	7	0	0	7	7	7	7	7	7	2	2	2	6	2	2
8	8	8	8	8	8	7	7	7	7	7	7	8	2	8	5	8	2
0	8	0	0	0	0	7	7	7	7	0	7	2	7	2	2	1	1
8	0	8	0	3	5	6	6	6	6	6	6	7	6	8	7	6	7
5	0	0	5	0	0	7	7	7	7	6	7	4	2	2	0	6	4
8	0	5	5	5	5	7	7	7	7	7	7	7	7	7	7	7	7
0	4	8	4	4	4	0	0	0	0	0	0	2	6	7	4	4	3
8	5	5	5	0	5	7	0	7	6	6	8	8	6	5	7	8	5
8	0	0	5	0	5	7	6	6	6	0	6	6	8	7	7	0	7
9	9	9	9	7	9	7	7	7	7	6	7	8	8	8	8	7	8
8	8	3	3	8	7	8	8	8	8	8	8	8	8	5	5	8	8
0	7	0	0	0	5	8	8	8	6	7	7	8	8	7	8	6	6
9	8	5	5	0	8	8	7	6	6	6	6	8	7	8	8	7	7
8	8	8	8	0	8	8	7	7	6	0	7	8	7	5	6	6	6
8	8	8	8	8	8	7	6	6	6	6	6	8	7	8	7	2	2
3	7	0	0	7	8	6	6	6	6	6	6	6	7	0	0	7	7
8	0	0	0	3	7	8	7	7	7	6	7	7	6	7	6	7	6
0	7	8	0	0	7	7	6	7	7	0	7	8	7	8	4	0	8
8	8	8	8	8	8	7	7	7	6	7	7	5	1	1	8	1	1
9	9	9	9	9	9	7	7	7	7	7	7	8	8	8	8	8	8
8	8	8	8	0	0	7	7	6	7	7	6	8	8	2	8	1	1
8	8	8	0	5	8	7	6	7	6	6	7	7	8	8	8	8	8
7	7	7	0	7	7	7	6	7	6	6	7	7	7	7	5	5	7
8	8	8	8	8	7	7	6	6	6	6	7	8	4	8	6	5	6
8	7	4	0	7	7	7	7	7	0	6	7	8	5	6	6	7	8
7	6	8	7	7	6	7	7	7	0	5	7	6	7	7	2	0	6
8	6	7	0	7	8	6	6	7	7	6	6	8	4	7	4	1	6
9	9	9	7	5	6	6	6	6	6	6	7	8	5	8	5	6	6
9	0	0	1	9	9	7	6	6	6	7	7	7	2	2	8	9	10
8	8	8	8	8	8	7	6	7	6	6	7	7	7	8	8	8	8
5	5	8	5	5	5	6	7	6	7	7	7	8	8	8	7	7	8
7	7	7	7	8	6	7	6	7	6	7	6	8	8	8	8	8	6
8	8	8	8	0	0	7	7	7	7	0	7	7	7	7	7	0	6
7	0	8	8	7	8	6	6	7	7	7	7	8	1	8	7	7	7
8	8	8	8	8	8	7	7	7	7	7	7	8	6	6	6	6	6
8	8	8	8	6	5	7	6	7	6	6	6	8	6	8	8	6	8
7	7	7	0	0	7	7	5	5	0	0	7	8	6	7	0	0	7
7	0	7	3	3	3	6	0	8	0	7	7	2	0	9	0	8	2
3	5	5	3	7	6	6	6	6	6	6	6	7	5	8	8	8	8
9	7	7	5	4	6	7	6	7	7	0	7	7	8	7	6	6	6
8	8	8	8	6	8	7	6	7	7	7	7	6	2	5	5	5	5
4	3	3	0	2	2	7	7	7	7	0	4	1	0	0	2	0	5
7	7	7	5	7	7	6	7	4	4	0	6	6	8	2	6	5	7
0	7	7	0	5	2	4	4	4	4	4	4	5	5	7	0	6	5
5	5	5	5	6	6	6	7	6	7	6	6	5	4	4	4	4	4
5	5	5	4	3	3	7	7	6	6	6	6	8	2	6	6	4	4
0	0	0	0	0	3	0	0	7	0	0	7	0	0	0	8	0	7
5	5	5	2	5	4	7	7	7	7	7	7	7	6	7	7	7	7
7	0	7	0	7	5	7	0	7	7	6	6	8	0	2	8	0	2
5	5	5	5	4	3	6	0	5	5	0	6	7	0	6	6	1	7
5	5	4	7	6	6	7	7	7	7	7	7	7	7	0	6	7	7
7	0	7	0	6	7	7	0	6	6	7	6	7	0	8	5	6	7
6	9	5	6	3	3	6	6	6	6	6	6	8	8	7	8	7	2
10	10	0	0	0	0	7	6	0	5	0	0	8	8	0	8	0	0
8	8	8	5	5	3	7	7	6	6	6	6	8	8	8	4	4	8
8	5	5	5	8	5	7	7	7	7	7	7	8	6	7	4	8	6
5	5	7	5	5	5	6	6	7	5	6	6	7	7	7	7	7	8
8	8	5	6	5	7	7	6	6	6	6	6	7	8	7	6	8	8
7	7	7	7	7	7	7	7	7	7	7	7	5	8	2	2	7	2
7	7	7	0	0	8	7	6	6	6	6	6	7	5	7	5	9	5
9	9	9	9	8	8	7	4	6	6	6	6	8	8	8	8	8	8
8	8	5	8	8	5	6	0	7	6	6	6	8	8	8	8	8	8
8	7	5	4	7	7	7	7	7	7	7	7	8	8	8	6	6	5
8	8	8	5	9	8	7	7	7	7	7	7	6	7	6	6	7	7
8	8	8	3	8	8	7	7	7	4	7	7	8	8	8	2	8	8
8	8	8	8	8	8	6	5	7	6	7	7	8	8	8	8	8	8
7	7	8	8	8	8	7	7	6	7	7	7	8	8	8	8	9	8
8	8	8	8	0	0	7	7	7	7	7	7	8	8	8	8	2	0
8	8	8	3	8	8	7	6	7	7	6	6	6	6	7	7	4	7
3	3	8	8	8	3	7	7	7	7	7	7	0	0	9	4	4	4
7	7	7	7	7	7	6	6	6	6	6	6	6	6	6	6	6	4
8	8	8	6	7	7	5	6	6	6	7	6	8	8	8	7	7	5
4	5	5	4	5	5	7	6	7	7	7	7	2	2	2	2	2	2
7	7	7	5	7	7	7	7	7	6	7	7	5	5	8	4	5	5
8	8	7	3	3	5	7	6	7	6	7	6	7	7	7	2	8	8
8	8	8	8	5	7	7	7	7	2	7	7	8	8	8	8	8	8
7	7	2	2	2	2	7	7	7	7	7	7	8	8	7	8	7	8
0	0	5	5	0	0	7	7	7	6	7	7	7	7	9	8	7	7
8	8	8	8	9	8	7	7	7	6	7	7	8	8	8	8	8	8
8	8	8	8	8	8	7	7	7	7	7	7	8	8	8	8	8	8
8	8	8	8	8	9	7	6	7	7	7	7	8	3	8	8	8	8
5	6	4	2	4	0	7	7	7	7	7	7	8	3	8	8	8	6
8	7	8	8	8	8	7	7	7	7	7	7	7	5	3	6	7	7
7	0	7	8	7	0	7	7	7	7	7	7	8	0	8	7	7	5
8	8	8	8	2	8	7	7	7	7	6	7	8	8	2	5	2	8
8	3	7	7	7	7	7	6	7	6	7	6	7	6	7	2	5	5
8	8	8	8	8	8	8	8	8	6	8	8	8	8	8	5	8	8
5	5	8	7	6	8	7	7	7	7	7	7	5	8	8	8	7	8
6	6	7	7	7	5	7	7	7	7	7	7	7	7	7	7	7	7
7	7	7	7	7	7	7	7	7	7	7	7	8	8	8	0	8	8
7	7	7	7	0	7	7	7	7	7	5	7	7	7	7	5	2	7
5	5	4	5	5	8	7	6	6	5	0	7	8	6	8	6	1	8
8	5	7	6	6	6	7	3	7	7	6	7	8	3	6	6	5	8
7	7	7	5	5	8	5	4	5	3	8	0	7	5	8	1	7	7
7	7	7	5	7	6	6	2	6	3	4	5	8	5	8	6	6	6
8	5	5	6	7	7	6	6	7	5	5	7	8	8	8	1	8	8
6	6	6	0	7	7	7	6	7	5	7	5	8	8	8	0	8	6
5	5	5	5	0	5	0	0	6	2	0	6	8	8	6	7	0	8
7	7	7	7	7	7	6	7	6	6	6	6	8	8	7	7	3	3
8	8	7	7	7	7	6	6	6	6	7	6	8	8	8	8	8	8
7	7	7	7	7	7	5	3	7	7	7	7	8	0	8	1	1	7
7	7	7	7	7	7	7	7	7	7	7	6	8	8	7	0	8	8
7	7	5	5	5	5	7	5	7	6	7	7	8	3	1	6	6	6
7	7	7	7	0	7	7	7	7	7	0	7	8	7	8	8	0	7
7	7	7	7	7	7	7	7	6	6	5	8	8	8	8	8	6	6
7	7	7	7	7	7	8	8	8	8	8	8	8	8	8	8	8	8
7	7	7	7	7	7	7	6	6	5	0	7	8	8	8	0	0	8
8	8	8	8	0	8	7	4	6	4	5	6	8	8	8	8	6	3
8	8	8	0	5	8	6	6	7	0	0	7	8	8	8	0	6	7
7	7	7	6	7	7	6	6	7	6	7	7	7	7	7	7	7	7
7	7	7	7	7	7	7	0	6	6	7	5	8	0	8	8	8	8
7	0	5	5	7	7	7	0	6	4	7	7	8	0	8	7	7	7
7	5	3	3	3	5	7	7	0	7	7	7	8	4	7	0	0	0
7	7	5	7	5	7	7	7	6	6	6	6	7	6	7	8	8	8
5	5	5	5	6	6	7	7	7	6	6	6	7	8	8	8	7	6
8	8	8	5	8	8	7	6	6	5	5	6	8	7	8	7	8	8
8	5	7	7	7	7	7	6	7	5	5	6	8	5	7	7	8	7
5	5	5	3	7	5	5	5	5	5	6	6	7	6	8	7	7	8
7	7	7	7	7	7	5	5	0	7	6	7	8	8	8	8	8	8
8	8	8	8	8	8	7	5	7	7	7	7	8	8	8	8	8	8
7	7	7	7	7	7	6	7	7	6	0	7	8	8	8	7	0	8
7	7	7	7	0	7	6	7	0	5	0	8	7	3	7	7	0	7
7	7	7	7	7	7	7	0	7	3	0	0	8	2	8	1	7	6
7	3	6	7	7	7	7	6	6	7	6	6	6	6	8	7	5	7
7	7	7	7	7	7	7	6	7	7	7	7	8	8	8	8	8	8
7	7	7	7	0	7	8	7	7	7	7	7	8	7	8	7	1	7
7	5	7	5	7	7	7	7	8	7	7	6	8	8	8	8	4	8
7	7	7	7	7	7	7	7	7	7	7	6	8	8	8	8	8	8
7	7	7	7	7	7	7	7	7	7	6	6	8	8	8	8	8	8
7	7	7	7	7	7	8	7	7	7	7	7	8	5	8	6	8	8
7	7	7	7	7	7	7	7	7	7	7	7	6	7	8	7	8	8

## Sheet: G-Eval Score
GPT-4	Bard	Claude-2.0	LLaMa-2	ERINE-Bot-4.0	Qwen-Max
0.4	0.3	0.55	0.3	0.35	0.17
0.7	0.7	0.54	0.55	0.55	0.4
0.65	0.37	0.25	0.28	0.1	0.6
0.18	0.1	0.5	0.14	0.5	0.3
0.1	0.1	0.25	0.1	0	0.25
0.3	0.1	0.86	0.3	0.3	0.2
0.17	0.25	0.2	0.1	0.18	0.16
0.35	0.2	0.26	0.75	0.65	0.4
0.3	0.2	0.27	0.1	0.3	0.47
0.2	0.2	0.3	0.2	0.2	0.11
0	0.06	0.4	0.2	0.16	0.4
0.7	0.3	0.6	0.05	0.3	0.21
0.2	0.15	0.18	0.15	0	0.1
0.2	0.45	0.62	0.25	0.1	0.5
0.6	0.52	0.2	0	0.2	0.05
0.35	0.1	0.55	0.45	0.75	0.48
0.5	0.3	0.26	0.5	0.25	0.7
0.65	0.68	0.54	0.4	0.53	0.6
0.43	0.42	0.75	0.1	0.15	0.3
0.78	0.39	0.7	0.15	0.52	0.9
0.63	0.62	0.3	0.1	0.52	0.32
0.08	0.1	0.2	0.25	0.1	0.15
0.3	0.2	0.5	0.1	0.3	0.3
0.92	0.65	0.33	0.35	0.85	0.5
0.84	0.2	0.87	0.2	0.2	0.54
0.15	0.2	0.45	0.1	0.1	0.2
0.32	0.35	0.4	0.15	0.15	0.5
0.3	0.15	0.25	0.15	0.5	0.25
0.1	0.1	0.2	0	0.05	0.15
0.3	0.25	0.35	0.2	0.24	0.42
0.64	0.9	0.57	0.6	0.85	0.66
0.9	0.15	0.33	0.14	0.75	0.62
0.1	0.26	0.16	0.2	0.2	0.2
0.34	0.34	0.25	0.1	0.2	0.15
0.4	0.46	0.2	0.2	0.1	0.45
0.28	0.3	0.2	0.15	0.05	0.31
0.3	0.02	0.2	0.1	0.05	0.2
0.6	0.11	0.81	0.1	0.1	0.38
0.5	0.4	0.65	0.7	0.8	0.6
0.3	0.28	0.2	0.17	0.16	0.35
0.33	0.42	0.46	0.27	0.34	0.58
0.1	0.2	0.15	0.1	0	0.2
0.23	0.4	0.2	0.2	0.7	0.3
0.65	0	0.84	0.55	0.2	0.6
0.57	0.25	0.55	0.57	0.65	0.59
0.1	0.85	0.39	0.1	0.15	0.6
0.15	0.1	0.35	0.1	0.2	0.25
0.26	0.3	0.23	0	0.15	0.3
0.4	0.23	0.36	0.15	0.4	0.65
0.83	0.63	0.85	0.35	0.26	0.6
0.3	0.23	0.54	0.1	0.41	0.18
0.15	0.25	0.2	0.21	0.6	0.3
0.53	0.66	0.58	0.1	0.55	0.42
0.79	0.2	0.35	0.45	0.56	0.25
0.3	0.35	0.45	0.2	0.1	0.45
0.3	0.28	0.28	0.2	0.15	0.2
0.24	0.2	0.13	0.05	0.42	0.28
0.4	0.19	0.65	0.4	0.25	0.4
0.2	0.15	0.5	0.3	0.6	0.54
0.1	0.16	0.2	0.15	0.1	0.5
0.2	0.2	0.1	0.3	0.81	0.25
0.45	0.28	0.27	0.2	0.22	0.17
0.25	0.17	0.11	0.2	0.2	0.3
0.5	0.05	0.2	0.35	0.7	0.4
0.31	0.3	0.1	0.1	0.3	0.4
0.58	0.3	0.36	0.3	0.1	0.48
0.16	0.2	0.24	0.2	0.18	0.05
0.28	0.75	0.25	0.6	0.4	0.4
0.86	0.7	0.9	0	0.05	0.89
0.23	0.35	0.56	0.1	0.1	0.56
0.44	0.25	0.6	0.1	0.4	0.55
0.23	0.23	0.2	0.05	0.1	0.16
0.6	0.2	0.25	0.15	0.08	0.58
0.4	0.43	0.5	0.3	0.15	0.2
0.15	0.1	0.25	0.1	0	0.3
0.17	0.1	0.3	0.05	0.3	0.05
0.2	0.3	0.2	0.19	0.05	0.2
0.28	0.3	0.16	0.1	0.25	0.2
0.8	0.87	0.76	0.23	0.4	0.65
0.11	0.64	0.6	0.2	0.83	0.72
0.52	0.18	0.83	0.1	0.29	0.66
0.1	0.29	0.4	0.2	0.9	0.25
0.14	0.1	0.16	0.1	0.2	0.25
0.86	0.85	0.95	0.9	1	0.9
0.35	0.7	0.65	0.35	0.4	0.6
0.68	0.9	0.9	0.7	0.7	0.78
0.54	0.26	0.56	0.07	0	0.19
0.2	0	0.15	0.1	0.05	0
0.3	0.2	0.19	0.1	0.1	0.1
0.6	0.15	0.16	0.1	0.1	0
0.26	0.45	0.26	0.2	0.29	0.5
0.3	0.2	0.61	0.45	0.5	0.4
0.2	0.17	0.15	0.1	0.5	0.65
0.7	0.6	0.1	0.7	0.7	0.2
0.97	0.81	0.9	0.7	0.86	0.8
0.3	0.52	0.72	0.2	0.55	0.34
0.58	0.1	0.3	0.16	0.25	0.3
0.3	0.3	0.26	0.15	0.3	0.22
0.2	0.2	0.2	0	0.1	0.34
0.1	0.45	0.3	0.35	0.25	0.1
0.26	0.1	0.1	0.1	0.1	0.2
0.56	0.6	0.5	0.35	0.3	0.62
0.32	0.4	0.4	0.27	0.35	0.36
0.13	0.25	0.28	0.1	0.1	0.42
0.75	0.57	0.5	0.1	0.32	0.56
0.26	0.2	0.1	0.55	0	0.3
0.25	0.74	0.3	0.1	0.2	0.2
0.5	0.65	0.6	0.2	0.74	0.56
0.3	0	0.2	0.2	0.12	0.2
0.2	0.3	0.55	0.1	0.3	0.55
0.25	0.27	0.12	0.1	0.35	0.3
0.48	0.3	0.31	0.7	0.4	0.43
0.08	0.35	0.5	0.1	0.35	0.24
0.2	0.4	0.2	0.3	0.2	0.25
0.36	0.1	0.2	0.1	0.2	0.24
0.17	0.15	0.3	0.16	0.3	0.02
0.67	0.25	0.8	0.1	0.6	0.2
0.15	0.4	0.32	0.2	0.21	0.3
0.75	0.6	0.88	0.75	0.63	0.77
0.15	0.23	0.5	0.25	0.22	0.12
0.26	0.6	0.3	0.1	0.2	0.2
0.46	0.28	0.7	0.1	0.22	0.75
0.78	0.75	0.7	0.6	0.1	0.47
0.26	0.2	0.3	0.25	0.1	0.2
0.2	0.33	0.16	0.12	0.25	0.6
0.26	0.75	0.7	0.3	0.55	0.76
0.74	0.86	0.6	0.45	0.85	0.8
0.2	0.2	0	0	0.21	0.1
0.35	0.33	0.3	0.1	0.2	0.3
0.8	0.3	0	0.05	0.25	0.87
0.5	0.37	0.36	0.05	0.3	0.56
0.45	0.75	0.2	0	0.2	0.2
0.1	0.1	0	0	0.15	0.2
0.15	0.05	0.1	0.1	0.7	0.17
0.17	0.1	0.16	0	0.29	0.17
0.4	0.2	0.1	0.1	0.2	0.36
0.2	0.35	0.2	0.2	0.1	0.11
0.9	0.65	0.5	0.1	0.3	0.4
0.81	0.06	0.7	0.2	0.14	0.4
0.5	0.3	0.4	0.5	0.35	0.3
0	0.48	0.05	0.1	0.2	0.15
0.35	0.21	0.22	0.2	0.45	0.1
0.3	0.35	0.2	0.2	0.49	0.21
0.11	0.5	0.2	0.65	0.3	0.78
0.2	0.2	0.2	0.1	0.2	0.1
0.35	0.17	0.14	0.2	0.25	0.6
0.1	0.15	0.27	0.3	0.3	0.35
0.5	0.2	0.31	0.35	0.1	0.5
0.11	0.75	0.9	0.05	0.14	0.28
0.2	0.1	0.1	0.1	0	0.28
0.2	0.25	0.1	0.15	0.2	0.2
0.3	0.2	0.2	0.1	0.4	0.3
0.1	0.15	0.27	0.16	0.7	0.1
0.2	0.2	0.3	0.1	0.45	0.3
0.15	0.1	0.2	0.06	0.11	0.4
0.3	0.3	0.56	0.2	0.2	0.45
0.62	0.15	0.73	0.1	0.1	0.78
0.88	0.8	0.5	0.2	0.2	0.55
0.6	0.2	0.65	0.25	0.7	0.1
0.21	0.6	0.53	0.25	0.35	0.2
0.3	0.15	0.59	0.15	0.1	0.16
0.15	0.2	0.27	0.25	0.17	0.2
0.23	0.94	0.83	0.1	0.2	0.2
0.26	0.2	0.28	0.15	0.19	0.18
0.25	0.55	0.83	0.3	0.46	0.6
0	0.05	0.2	0.15	0.1	0.05
0.37	0.25	0.45	0.26	0.2	0.52
0.7	0.4	0.7	0.45	0.2	0.26
0.45	0.26	0.4	0.07	0.6	0.5
0.86	0.4	0.8	0	0	0.83
0.11	0.2	0.15	0.1	0.2	0.2
0.17	0.2	0.08	0.3	0	0.45
0.82	0.92	0.9	0.7	0.62	0.81
0.16	0.12	0.14	0.05	0.27	0.36
0.1	0.1	0.15	0.1	0.1	0.2
0.32	0	0.3	0.11	0.16	0.29
0.1	0.05	0.1	0.6	0.4	0.2
0.4	0.16	0.2	0.2	0.2	0.38
0.2	0.3	0.85	0.2	0.7	0.25
0.5	0.75	0.15	0.7	0.6	0.3
0.14	0.1	0.2	0.1	0.87	0.07
0.75	0.2	0.7	0.25	0.3	0.2
0.6	0.46	0.4	0.16	0.4	0.45
0.85	0.3	0.8	0.25	0.46	0.3
0.3	0.15	0.6	0.1	0.5	0.55
0.47	0.16	0.35	0.15	0.3	0.5
0.3	0.14	0.35	0	0.2	0.2
0.2	0.1	0.4	0.1	0.15	0.42
0.2	0.3	0.2	0.15	0.2	0.19
0.3	0.2	0.5	0.3	0.2	0.48
0.7	0.57	0.6	0.85	0.25	0.47
0.15	0.3	0.36	0.2	0.1	0.29
0.4	0.31	0.55	0.15	0.36	0.32
0.78	0.18	0.1	0.1	0.1	0.3
0.3	0.1	0.1	0.15	0.2	0.31
0.36	0.35	0.4	0.1	0.57	0.45
0.5	0.1	0.7	0.1	0.34	0.6
0.2	0.1	0.2	0.2	0.3	0.2
0.2	0.78	0.5	0.1	0.1	0.82
0.3	0.72	0.9	0.2	0.8	0.4
0.88	0.05	0.8	0.15	0.86	0.52
0.53	0.17	0.75	0.1	0.3	0.2
0.35	0.15	0.3	0.15	0.39	0.41
0.3	0.395	0.45	0.17	0.26	0.6
0.2	0.2	0.21	0.2	0.26	0.2
0.9	0.1	0.37	0.05	0.1	0.5
0.12	0.92	0.93	0.05	0.2	0.05
0.36	0.2	0.76	0.05	0.2	0.7
0.21	0.2	0.1	0.1	0.16	0.12
0.2	0.25	0.25	0.16	0.3	0.2
0.2	0.2	0.2	0.25	0.2	0.2
0.76	0.28	0.11	0.2	0.1	0.2
0	0	0.25	0.1	0.2	0.31
0.4	0.2	0.4	0.25	0.05	0.23
0.2	0.12	0.3	0.1	0.3	0.15
0.07	0.1	0.15	0.05	0	0.12
0.32	0.1	0.3	0.2	0.2	0.28
0.87	0.86	0.39	0.1	0.3	0.1
0.1	0	0.2	0.1	0.16	0.13
0.05	0.25	0.11	0.4	0.2	0.66
0.1	0.3	0.46	0.1	0.16	0.35
0.3	0.46	0.42	0.25	0.34	0.78
0.13	0.4	0.61	0.4	0.58	0.65
0.15	0.1	0.1	0.1	0.1	0.2
0.1	0.1	0.35	0.1	0.11	0.2
0.2	0.05	0.13	0.45	0.1	0.25
0.2	0.2	0.2	0.1	0.1	0.15
0.13	0.15	0.62	0.1	0	0.2
0.6	0.5	0.6	0.3	0.2	0.68
0.15	0.02	0.1	0.18	0.1	0.06
0.2	0.16	0.15	0.2	0.35	0.18
0.4	0.6	0.85	0.1	0.55	0.7
0.16	0	0.12	0.1	0.1	0.27
0.88	0.22	0.27	0.5	0.05	0.1
0.66	0.39	0.25	0.65	0.16	0.3
0.34	0.64	0.2	0.26	0.45	0.7
0.23	0.67	0.65	0.25	0.35	0.38
0.68	0.43	0.3	0.24	0.3	0.5
0.9	0.21	0.3	0.2	0	0.34
0.45	0.2	0.1	0.1	0.15	0.2
0.55	0.29	0.18	0.15	0.35	0.42
0.25	0.25	0.62	0.15	0.25	0.2
0.49	0.46	0.34	0	0	0.37
0.9	0.19	0.1	0.9	0.1	0.31
0.85	0.93	0.9	0.87	0.83	0.6
0.86	0.88	0.06	0.15	0.26	0.45
0.1	0.38	0.3	0.2	0.16	0.62
0.25	0.2	0.2	0.2	0.16	0.1
0.37	0.15	0.25	0.2	0.2	0.35
0.12	0.4	0.7	0.2	0.26	0.5
0.1	0.2	0.42	0.1	0.2	0.18
0.15	0.2	0.4	0.1	0.6	0.19
0.2	0.32	0.25	0.05	0.17	0.62
0.31	0.2	0.2	0.1	0.3	0.76
0.35	0.7	0.2	0.35	0.5	0.7
0.56	0.2	0.4	0.2	0.1	0.2
0.58	0.1	0.1	0.19	0.46	0.17
0.21	0.24	0.24	0.1	0.17	0.1
0.3	0.12	0.1	0.2	0.3	0.4
0.35	0.23	0.15	0.4	0.37	0.5
0.57	0.2	0.84	0.2	0.2	0.36
0.08	0.1	0.3	0.1	0	0.2
0.1	0.03	0.2	0.1	0.25	0.12
0.25	0.2	0.1	0.15	0	0.42
0.3	0.12	0.2	0.3	0.2	0.24
0.54	0.2	0.3	0.25	0.2	0.15
0.39	0.3	0.16	0	0.1	0.1
0.15	0.1	0.2	0.1	0.1	0.1
0.2	0.17	0.85	0.2	0.2	0.48
0.25	0.2	0.3	0.1	0.1	0.2
0.17	0.15	0.1	0.2	0.15	0.11
0.1	0.32	0.3	0.1	0.28	0.39
0.15	0.15	0.32	0.25	0.2	0.15
0.15	0.1	0.1	0.1	0	0.1
0.3	0.1	0.5	0.2	0.1	0.35
0.7	0.49	0.3	0	0.53	0.55
0.13	0.2	0.23	0.1	0.14	0.55
0.15	0.3	0.1	0.05	0.24	0.2
0.9	0.66	0.2	0.2	0.05	0.1
0.2	0.39	0.2	0.15	0.56	0.4
0.4	0.15	0.4	0.3	0.7	0.3
0.2	0.32	0.7	0.2	0.55	0.55
0.28	0.2	0.3	0.25	0.56	0.6
0.2	0.36	0.07	0.05	0.1	0.2
0.15	0.05	0.26	0.5	0.2	0.17
0.5	0.95	0.55	1	0.9	1
1	1	0.5	1	0.95	0.57
0.38	0.75	0.51	0.25	0.21	0.3
0.6	0.6	0.5	0.1	0.3	0.6
1	1	0.9	0.2	1	1
0.95	0.8	0.1	1	0.86	1
0.5	0.6	0.2	0.2	0.2	0.4
0.41	0.3	0.6	0.2	0.36	0.2
0.3	0.24	0.3	0.3	0.15	0.45
0.11	0.1	0.9	0.2	0.06	0.2
0.36	0.4	0.4	0.45	0.6	0.4
0.59	0.59	0.15	0.1	0.2	0.2
0.11	0.22	0.3	0.1	0.2	0.2
0.12	0.25	0.23	0.45	0.42	0.2
0.17	0.37	0.28	0.1	0.1	0
0.3	0.27	0.3	0.3	0.46	0.3
0.5	0.49	0.3	0.15	0.19	0.4
0.3	0.3	0.41	0.2	0.15	0.42
0.2	0.38	0.3	0.2	0.27	0.25
0.65	0.2	0.9	0.65	0.6	0.49
0.4	0.2	0.49	0.56	0.34	0.4
0.2	0.3	0.25	0.3	0.2	0.1
0.3	0.25	0.1	0.1	0.5	0.32
0.7	0.3	0.5	0.35	0.2	0.1
0.55	0.27	0.2	0.15	0.1	0.4
0.25	0.25	0.4	0.2	0.5	0.25
0.85	0.6	0.84	0.15	0.87	0.95
0.7	0.36	0.45	0.1	0.52	0.38
0.45	0.38	0.21	0.2	0.2	0.2
0.65	0.4	0.7	0.46	0.7	0.61
0.26	0.2	0.25	0.1	0.15	0.45
0.45	0.4	0.55	0.45	0.2	0.5
0.56	0.2	0.5	0.2	0.5	0.68
0.6	0.17	0.4	0	0.3	0.2
0.3	0.1	0.28	0.2	0.2	0.61
0.15	0.1	0.7	0.1	0.1	0.4
0.16	0.3	0.21	0.1	0.5	0.05
0.2	0.1	0.3	0.1	0.1	0.15
0.15	0.2	0.1	0.2	0.2	0.4
0.34	0.3	0.63	0.6	0.75	0.65
0.3	0.1	0.5	0.1	0.17	0.35
0.56	0.45	0.38	0.1	0.72	0.4
0.17	0.1	0.3	0.25	0.2	0.2
0.3	0.29	0.4	0.08	0	0.24
0.56	0.4	0.5	0.15	0.2	0.5
0.35	0.5	0.28	0.71	0.6	0.7
0.63	0.75	0.6	0.15	0.1	0.6
0.38	0.53	0.3	0.2	0.3	0.35
0.2	0.3	0.22	0	0.1	0.3
0.66	0.4	0.42	0.16	0.3	0.26
0.31	0.05	0.41	0.5	0.3	0.2
0.58	0.16	0.3	0.2	0.11	0.1
0.4	0.3	0.28	0.2	0.28	0.3
0.25	0.21	0.3	0.19	0.25	0.37
0.3	0.5	0.3	0.3	0.1	0.35
0.2	0.2	0.24	0.05	0.3	0.3
0.6	0.4	0.8	0.16	0.6	0.36
0.15	0.1	0.2	0.1	0.2	0
0.49	0.42	0.45	0.17	0.28	0.6
0.4	0.3	0.1	0.4	0.17	0.25
0.66	0.84	0.62	0.16	0.2	0.5
0.55	0.34	0.13	0.3	0.1	0.2
0.37	0.1	0.2	0.1	0.4	0.42
0.29	0.3	0.48	0.36	0.1	0.15
0.35	0.2	0.3	0.25	0.5	0.55
0.3	0.15	0.3	0.26	0.15	0.4
0.2	0.1	0.04	0.15	0.5	0.15
0.4	0.5	0.48	0.23	0.1	0.2
0.2	0.2	0.45	0.1	0.35	0.2
0.36	0.2	0.25	0.3	0.26	0.2
0.2	0.12	0.3	0.2	0.35	0.5
