# Supplementary material for: Evaluating the performance of large language &amp; visual-language models in cervical cytology screening
Source: Research Square preprint supplement (doi:10.21203/rs.3.rs-5849716/v1), 2025-04-15
Supplement: Supplementary file 2 [file 5df57b17edbd1e1f4bdb958e.xlsx]

## Sheet: Fig. 6a
Model	Expert One Score	Experts Two Score	Experts Three Score
GPT-4-V	6.54867	5.72566	6.11504
Gemini	5.29204	4.76991	5.45133
LLaVa	5.71681	3.72477	4.47788
Qwen-VL	5.45133	3.71681	4.81416

## Sheet: Fig. 6b
	Expert One Score	Experts Two Score	Experts Three Score
GPT-4-V	97	88	86
Gemini	25	28	78
LLaVa	48	9	63
Qwen-VL	37	10	85

## Sheet: Fig. 6c
	Selected By One Expert Score	Selected By Two Experts Score	Selected By Three Experts
GPT-4-V	11	40	60
Gemini	31	31	16
LLaVa	40	22	11
Qwen-VL	41	21	5

## Sheet: Fig. 6d
	Expert 1	Experts 2	Experts 3
Expert 1	1	0.530973	0.495133
Experts 2	0.530973	1	0.609292
Experts 3	0.495133	0.609292	1

## Sheet: Fig. 6e
Model	Mean	Std	Q1	Q3
GPT-4V	0.267699	0.192896	0.2	0.4
Gemini	0.27854	0.248999	0.1	0.4
LLaVa	0.162389	0.111214	0.1	0.2
Qwen-VL	0.235885	0.21873	0.1	0.3

## Sheet: Answer Details
GPT-4V-Expert One	Gemini-Expert One	LLaVa-Expert One	Qwen-VL-Expert One	GPT-4V-Expert Two	Gemini-Expert Two	LLaVa-Expert Two	Qwen-VL-Expert Two	GPT-4V-Expert Three	Gemini-Expert Three	LLaVa-Expert Three	Qwen-VL-Expert Three
8	6	6	6	8	7	7	7	8	8	8	8
7	5	6	4	8	7	0	6	8	8	0	8
8	7	7	7	7	6	6	6	5	8	1	4
8	5	7	5	7	7	7	0	9	6	1	1
7	6	7	4	7	6	5	0	6	3	2	5
7	4	4	6	7	0	0	0	7	1	0	5
6	6	7	7	4	7	6	0	3	2	7	0
6	5	4	5	7	2	2	2	2	0	0	1
7	6	7	7	7	5	5	6	8	2	8	7
7	4	5	4	7	2	2	2	0	0	1	0
6	6	5	5	5	7	0	0	1	9	3	2
5	7	5	5	6	7	5	0	2	8	3	3
6	5	6	5	0	0	0	2	2	1	0	4
7	6	6	7	7	7	4	0	8	5	3	1
6	5	6	6	7	6	6	5	7	7	7	3
6	6	6	6	7	6	4	6	7	7	6	7
5	4	5	4	7	7	6	0	8	8	8	2
7	6	7	6	7	5	0	4	8	8	2	8
6	6	5	6	7	6	0	7	8	5	8	5
6	6	7	6	5	4	7	7	8	5	2	6
6	5	5	5	7	6	0	6	5	7	0	8
6	5	5	5	6	6	6	6	8	8	8	8
7	6	7	5	5	5	4	0	8	5	2	0
6	5	7	6	7	5	4	4	8	1	2	2
6	7	6	6	4	0	0	0	1	1	1	1
6	4	6	6	6	2	7	4	8	4	6	6
6	5	6	6	2	0	2	2	5	4	6	5
7	4	6	2	6	0	0	0	8	2	2	0
6	5	6	5	6	0	3	0	2	1	0	0
7	5	3	5	7	7	0	4	8	9	0	7
7	6	7	7	4	4	4	4	1	0	4	0
7	5	4	5	4	4	0	4	2	0	0	2
7	5	7	6	0	0	0	0	2	2	2	0
7	5	7	5	4	4	0	0	6	9	0	2
7	4	6	4	2	2	4	4	9	1	9	9
6	3	6	3	2	2	0	2	2	1	0	0
7	5	7	7	4	0	2	0	1	0	0	0
8	3	3	4	0	0	0	0	1	1	1	1
7	3	5	6	0	7	0	0	1	0	1	0
7	4	3	6	7	3	0	6	9	1	0	9
7	6	7	6	5	6	3	4	9	8	9	9
7	7	7	6	6	7	6	5	8	8	5	8
7	4	4	6	4	7	5	5	5	6	5	5
7	6	7	6	5	7	6	5	8	8	8	8
7	6	6	6	6	6	4	4	5	3	1	2
7	3	3	5	4	0	0	0	2	1	0	0
7	5	7	7	5	7	0	0	8	8	0	2
7	7	7	6	7	4	4	0	7	8	3	8
6	6	6	5	5	5	0	0	2	7	2	2
7	3	6	6	5	0	5	6	5	7	8	7
6	6	7	5	7	7	6	5	7	7	7	4
8	4	5	6	7	0	4	0	8	0	8	0
7	6	7	6	5	0	0	0	5	1	0	1
7	6	6	6	6	7	4	5	8	8	7	8
7	5	7	7	6	7	6	7	8	8	8	8
7	6	7	5	6	5	7	5	8	6	8	8
7	5	7	3	6	5	4	0	2	2	2	1
7	6	7	7	7	6	6	4	8	7	7	7
6	4	5	5	0	0	0	0	3	6	3	3
7	5	7	4	7	7	6	3	8	7	7	8
7	7	8	7	7	7	7	6	3	6	6	6
7	7	8	6	5	5	5	4	8	1	8	2
7	4	6	7	7	0	0	3	8	3	8	8
7	3	6	6	6	0	0	2	8	4	0	1
7	5	5	5	7	6	5	7	8	8	8	8
6	7	5	5	7	7	0	5	8	8	8	8
7	6	7	7	6	6	6	6	8	8	8	6
6	6	5	5	6	6	6	6	5	8	7	5
7	5	5	2	7	7	7	0	8	8	7	2
5	6	6	4	7	7	7	7	8	8	7	5
6	5	4	6	7	7	0	7	8	8	8	8
7	5	6	5	7	4	4	4	9	5	4	7
7	7	6	7	7	6	6	6	8	8	6	6
7	5	6	6	7	7	7	7	8	8	8	8
7	5	7	7	8	7	7	7	8	8	8	8
6	5	7	5	8	7	7	7	8	8	8	6
7	6	6	6	7	0	0	0	5	8	2	5
6	6	3	6	7	6	0	7	8	7	0	8
6	4	6	4	7	6	5	0	7	5	6	3
7	5	5	5	5	7	6	6	8	4	8	8
7	4	6	7	8	0	0	0	8	0	0	3
7	3	6	5	7	0	5	5	4	3	3	2
6	3	3	5	7	2	0	2	8	6	3	3
7	6	6	7	7	4	4	5	8	6	6	6
8	5	5	6	7	6	5	6	8	7	6	8
5	3	3	5	0	6	3	7	2	0	3	8
6	4	4	4	7	6	0	5	5	2	0	1
7	6	6	6	7	6	6	6	8	8	7	8
4	4	4	4	7	7	5	7	7	7	6	6
7	7	5	4	6	7	5	6	8	8	3	6
7	6	5	6	7	7	6	5	8	8	6	6
5	5	6	5	7	6	4	7	4	7	6	7
7	7	5	6	7	5	6	5	8	8	6	4
6	4	5	5	5	6	5	0	4	3	3	2
6	6	6	6	7	7	6	7	8	8	8	7
6	6	6	5	0	7	6	6	0	7	7	7
5	5	4	5	0	7	2	4	0	7	7	7
7	8	7	6	7	4	5	2	8	7	4	4
7	6	3	5	5	6	0	5	8	8	0	4
4	5	5	4	7	3	0	3	8	8	4	3
6	6	6	5	7	7	6	5	5	6	7	7
6	7	5	5	5	4	4	4	8	7	6	6
6	6	6	5	0	0	0	0	0	7	7	7
7	5	6	7	7	6	6	5	8	4	3	4
7	5	7	6	7	7	7	7	8	8	8	8
6	5	6	3	5	5	5	4	7	5	7	6
6	5	5	6	7	7	6	5	8	8	8	5
5	4	4	6	6	6	5	7	8	7	8	8
7	7	7	5	7	6	7	7	8	8	8	7
7	6	5	6	7	7	0	6	8	8	0	6
6	6	5	6	7	7	6	6	8	8	6	8
7	7	6	6	7	7	6	5	7	8	5	7
6	6	6	5	6	6	6	5	3	9	8	6
