# Supplementary material for: Evaluating the performance of large language &amp; visual-language models in cervical cytology screening
Source: Research Square preprint supplement (doi:10.21203/rs.3.rs-5849716/v1), 2025-04-15
Supplement: Supplementary file 3 [file d36cdba48677ff271120f11f.xlsx]

## Sheet: Fig. 5a
Close-Ended-QA										Open-Ended-QA-G-Eval									Open-Ended-QA-Expert-Evaluation
	GPT-4	Bard	Claude-2.0	LLaMa-2	ERNIE-Bot-4.0	Qwen-Max	Random				GPT-4	Bard	Claude-2.0	LLaMa-2	ERNIE-Bot-4.0	Qwen-Max				GPT-4	Bard	Claude-2.0	LLaMa-2	ERNIE-Bot-4.0	Qwen-Max
Chapter 3	0.567568	0.594595	0.594595	0.594595	0.594595	0.513514	0.567568			Chapter 3	0.295238	0.225714	0.348095	0.203333	0.242381	0.29381			Chapter 3	6.15873	4.25397	6.31746	5.31746	5.68254	6.09524
Chapter 4	0.615385	0.615385	0.692308	0.615385	0.576923	0.576923	0.384615			Chapter 4	0.409853	0.358382	0.398088	0.254559	0.363824	0.410735			Chapter 4	7.18137	6.67647	6.84804	5.98039	6.35784	6.66667
Chapter 5	0.690909	0.636364	0.636364	0.654545	0.630303	0.666667	0.454545			Chapter 5	0.371382	0.329013	0.385658	0.219013	0.314408	0.359737			Chapter 5	6.83991	6.46272	6.64912	5.97368	5.98684	6.63158
Chapter 6	0.756614	0.343915	0.772487	0.428571	0.677249	0.746032	0.534392			Chapter 6	0.357913	0.284565	0.351652	0.207826	0.251217	0.343304			Chapter 6	6.92464	5.87536	6.45507	5.45217	5.32174	6.3942

## Sheet: Fig. 5b
Close-Ended-VQA									Open-Ended-VQA-G-Eval							Open-Ended-VQA-Expert-Evaluation
	GPT-4V	Gemini	LLaVa	Qwen-VL	ViLT	Random				GPT-4V	Gemini	LLaVa	Qwen-VL				GPT-4V	Gemini	LLaVa	Qwen-VL
Chapter 2	0.521739	0.543478	0.565217	0.184783	0.336957	0.521739			Chapter 2	0.245122	0.281707	0.154878	0.229878			Chapter 2	5.89418	4.65079	4.26984	4.12698
Chapter 4	0.646154	0.630769	0.523077	0.292308	0.446154	0.4			Chapter 4	0.2225	0.24545	0.185	0.12			Chapter 4	7	6.03922	5.31373	5.43137
Chapter 5	0.636364	0.74026	0.25974	0.857143	0.636364	0.428571			Chapter 5	0.331579	0.284211	0.171053	0.231579			Chapter 5	6.83333	1.66667	3.33333	3.66667
Chapter 6	0.511111	0.866667	0.333333	0.977778	0.755556	0.533333			Chapter 6	0.254545	0.339773	0.145455	0.322955			Chapter 6	6.11802	5.72727	4.59091	5.13636
Chapter 7	0.464286	0.75	0.214286	0.892857	0.714286	0.392857			Chapter 7	0.338889	0.183333	0.183333	0.325			Chapter 7	6.68519	6.56944	5.74537	5.94907

## Sheet: Fig. 5c
Close-Ended-QA						Open-Ended-QA-G-Eval						Open-Ended-QA-Expert
	easy	normal	hard				easy	normal	hard				easy	normal	hard
GPT-4	0.941176	0.682028	0.0425532			GPT-4	0.427727	0.379486	0.297097			GPT-4	7.52652	7.01905	6.05376
Bard	0.830065	0.345622	0.12766			Bard	0.412273	0.299143	0.249624			Bard	7.26136	6.32381	4.89964
Claude-2.0	0.941176	0.654378	0.106383			Claude-2.0	0.417727	0.367886	0.347312			Claude-2.0	7.47727	6.74667	5.51254
LLaMa-2	0.908497	0.382488	0.106383			LLaMa-2	0.313636	0.209429	0.156129			LLaMa-2	6.97348	5.88762	4.40143
ERNIE-Bot-4.0	0.934641	0.56682	0.0638298			ERNIE-Bot-4.0	0.440568	0.283714	0.194516			ERNIE-Bot-4.0	7.27273	6.03048	4.0681
Qwen-Max	0.954248	0.626728	0.0638298			Qwen-Max	0.457159	0.348286	0.291183			Qwen-Max	7.35985	6.67048	5.48029
Random	0.470588	0.502304	0.553191

## Sheet: Fig. 5d
Close-Ended-VQA							Open-Ended-VQA-G-Eval							Open-Ended-VQA-Expert
	easy	normal	hard					easy	normal	hard					easy	normal	hard
GPT-4V	0.879121	0.552147	0.0943396				GPT-4V	0.382143	0.263725	0.179412				GPT-4V	7.13793	6.48567	4.57275
Gemini	0.989011	0.674847	0.150943				Gemini	0.348214	0.335784	0.135294				Gemini	6.63218	5.53571	2.92857
LLaVa	0.549451	0.368098	0.320755				LLaVa	0.210714	0.163725	0.120588				LLaVa	6.51724	4.59524	2.60714
Qwen-VL	0.912088	0.527607	0.0377358				Qwen-VL	0.289286	0.272647	0.136765				Qwen-VL	6.31034	4.76786	2.7381
ViLT	0.89011	0.441718	0.188679
Random	0.461538	0.478528	0.415094

## Sheet: Close-QA
Bard	Claude-2.0	GPT-4	LLaMa-2	ERNIE-Bot-4.0	Qwen-Max	Random-benchmark	Chapter	Difficulty
0	0	1	0	0	1	1	Chapter 3	normal
0	1	0	1	1	1	0	Chapter 3	normal
1	1	0	1	1	0	0	Chapter 3	normal
1	0	0	1	0	0	1	Chapter 3	normal
1	0	0	1	1	0	1	Chapter 3	normal
0	0	0	1	0	0	1	Chapter 3	hard
1	1	1	0	1	0	1	Chapter 3	normal
1	1	1	1	1	1	1	Chapter 3	easy
0	1	1	0	0	0	1	Chapter 3	normal
0	0	0	0	0	1	0	Chapter 3	hard
1	0	0	1	0	1	1	Chapter 3	normal
1	1	0	1	1	0	0	Chapter 3	normal
1	1	0	1	0	0	1	Chapter 3	normal
1	1	1	0	1	1	0	Chapter 3	easy
1	1	1	1	1	1	0	Chapter 3	easy
1	0	1	1	1	0	1	Chapter 3	normal
1	0	1	1	1	1	0	Chapter 3	easy
1	1	1	1	1	0	1	Chapter 3	easy
0	0	0	0	0	0	1	Chapter 3	hard
0	0	1	0	1	1	0	Chapter 3	normal
0	1	1	0	1	1	1	Chapter 3	normal
1	1	1	1	1	0	0	Chapter 3	easy
1	0	0	0	1	0	1	Chapter 3	normal
0	0	0	0	0	0	1	Chapter 3	hard
0	0	1	1	0	0	0	Chapter 4	normal
0	1	1	0	1	0	1	Chapter 4	normal
1	1	1	1	0	0	0	Chapter 4	normal
1	1	1	1	0	1	1	Chapter 4	easy
0	0	1	0	1	1	0	Chapter 4	normal
0	1	0	0	1	1	0	Chapter 4	normal
0	1	1	0	1	1	0	Chapter 4	normal
1	0	0	0	0	0	0	Chapter 4	hard
1	1	1	1	0	1	0	Chapter 4	easy
1	1	1	1	1	1	0	Chapter 4	easy
0	0	1	0	1	0	0	Chapter 4	normal
1	1	1	1	0	1	0	Chapter 4	easy
1	1	0	1	0	0	1	Chapter 4	normal
0	0	0	0	1	0	0	Chapter 4	hard
1	1	0	1	0	0	1	Chapter 4	normal
1	1	0	1	0	0	1	Chapter 4	normal
1	1	0	1	1	1	0	Chapter 4	easy
1	1	0	1	1	1	0	Chapter 4	easy
0	0	1	1	0	0	1	Chapter 4	normal
1	1	0	1	1	1	0	Chapter 4	easy
1	1	1	1	1	1	0	Chapter 4	easy
0	0	1	0	1	1	1	Chapter 4	normal
1	0	0	0	0	0	1	Chapter 4	hard
1	1	1	1	1	1	1	Chapter 4	easy
0	1	1	0	1	1	1	Chapter 4	normal
1	1	1	1	1	1	0	Chapter 4	easy
1	1	1	1	1	1	0	Chapter 5	easy
1	1	1	1	1	1	1	Chapter 5	easy
1	1	1	1	1	1	0	Chapter 5	easy
0	0	1	0	0	1	1	Chapter 5	normal
0	0	0	0	0	0	1	Chapter 5	hard
0	1	0	1	0	1	1	Chapter 5	normal
1	1	1	1	0	0	0	Chapter 5	normal
1	1	1	1	1	0	1	Chapter 5	easy
1	1	1	1	1	1	1	Chapter 5	easy
1	0	0	1	0	0	0	Chapter 5	normal
1	1	1	1	1	1	0	Chapter 5	easy
1	1	1	1	0	0	0	Chapter 5	normal
0	0	0	0	0	0	1	Chapter 5	hard
1	1	1	1	1	1	0	Chapter 5	easy
0	1	1	1	1	1	0	Chapter 5	easy
1	0	0	1	1	1	1	Chapter 5	normal
1	0	1	1	0	0	1	Chapter 5	normal
1	1	1	0	1	0	1	Chapter 5	normal
1	0	0	0	0	0	1	Chapter 5	hard
1	1	1	1	1	1	1	Chapter 5	easy
1	1	1	1	1	1	0	Chapter 5	easy
1	1	0	1	1	1	0	Chapter 5	easy
1	1	1	1	1	1	0	Chapter 5	easy
1	0	1	0	1	0	1	Chapter 5	normal
1	0	1	0	0	0	1	Chapter 5	normal
1	1	1	0	1	1	1	Chapter 5	easy
1	1	1	1	1	1	0	Chapter 5	easy
1	1	0	1	0	0	1	Chapter 5	normal
1	1	1	1	1	1	0	Chapter 5	easy
0	1	0	1	1	1	0	Chapter 5	normal
1	1	1	1	1	1	0	Chapter 5	easy
1	0	0	0	0	1	0	Chapter 5	normal
0	0	1	0	1	1	0	Chapter 5	normal
1	1	1	1	0	0	0	Chapter 5	normal
1	1	1	1	0	1	1	Chapter 5	easy
1	1	0	1	0	1	0	Chapter 5	normal
1	1	1	1	0	0	0	Chapter 5	normal
1	1	0	1	1	1	1	Chapter 5	easy
1	0	0	1	0	0	0	Chapter 5	normal
1	0	0	1	1	0	1	Chapter 5	normal
0	1	0	0	0	1	1	Chapter 5	normal
1	1	0	1	1	0	0	Chapter 5	normal
1	1	1	0	1	1	0	Chapter 5	easy
1	0	0	1	0	0	1	Chapter 5	normal
1	0	0	1	0	0	1	Chapter 5	normal
0	1	0	1	0	1	1	Chapter 5	normal
1	1	0	1	1	1	1	Chapter 5	easy
1	1	1	1	0	0	1	Chapter 5	normal
0	0	0	1	0	0	0	Chapter 5	hard
1	0	0	1	1	1	0	Chapter 5	normal
1	1	1	1	1	1	0	Chapter 5	easy
0	1	0	1	1	1	0	Chapter 5	normal
1	1	1	1	0	0	1	Chapter 5	normal
0	0	1	1	1	1	1	Chapter 5	normal
0	0	0	1	1	1	1	Chapter 5	normal
0	0	0	0	0	0	1	Chapter 5	hard
1	0	1	1	1	1	0	Chapter 5	easy
1	1	1	1	1	1	1	Chapter 5	easy
1	1	0	1	0	0	1	Chapter 5	normal
0	1	0	0	0	0	0	Chapter 5	hard
1	0	1	1	1	0	0	Chapter 5	normal
1	1	1	1	1	1	1	Chapter 5	easy
0	1	1	1	1	1	0	Chapter 5	easy
1	1	1	1	1	1	1	Chapter 5	easy
1	1	1	1	1	1	0	Chapter 5	easy
1	1	1	1	1	1	1	Chapter 5	easy
1	0	1	1	1	1	1	Chapter 5	easy
0	1	1	1	0	1	0	Chapter 5	normal
1	0	1	0	0	1	1	Chapter 5	normal
0	0	0	0	0	0	0	Chapter 5	hard
1	0	1	1	1	1	0	Chapter 5	easy
1	0	0	1	0	1	1	Chapter 5	normal
0	0	0	0	0	0	1	Chapter 5	hard
1	1	0	1	0	0	0	Chapter 5	normal
1	1	1	1	1	1	1	Chapter 5	easy
1	0	0	0	0	0	1	Chapter 5	hard
1	0	1	1	1	1	1	Chapter 5	easy
1	0	0	1	0	0	1	Chapter 5	normal
1	0	0	0	0	0	1	Chapter 5	hard
1	1	1	1	1	1	0	Chapter 5	easy
1	0	1	1	1	1	0	Chapter 5	easy
1	1	1	1	0	0	0	Chapter 5	normal
1	1	1	0	1	1	1	Chapter 5	easy
1	1	1	1	1	1	0	Chapter 5	easy
1	1	1	0	1	1	1	Chapter 5	easy
0	0	0	1	0	0	0	Chapter 5	hard
0	1	1	1	0	1	1	Chapter 5	normal
1	1	1	1	1	1	0	Chapter 5	easy
1	1	1	1	1	1	0	Chapter 5	easy
1	1	1	1	1	1	0	Chapter 5	easy
0	0	0	0	0	0	1	Chapter 5	hard
1	1	1	1	1	1	1	Chapter 5	easy
0	0	1	1	1	1	0	Chapter 5	normal
0	1	1	1	1	1	1	Chapter 5	easy
0	0	0	0	0	0	1	Chapter 5	hard
1	1	1	1	1	1	0	Chapter 5	easy
1	0	0	0	0	0	0	Chapter 5	hard
1	1	1	1	1	1	1	Chapter 5	easy
0	1	1	0	0	1	0	Chapter 5	normal
1	0	1	0	0	1	1	Chapter 5	normal
0	0	1	1	1	1	1	Chapter 5	normal
1	1	1	1	1	0	0	Chapter 5	easy
1	1	1	1	1	1	0	Chapter 5	easy
1	1	0	0	1	0	1	Chapter 5	normal
1	0	1	1	1	1	1	Chapter 5	easy
1	0	1	1	1	0	1	Chapter 5	normal
1	1	1	1	1	1	1	Chapter 5	easy
1	0	1	0	1	0	0	Chapter 5	normal
1	1	1	0	0	1	0	Chapter 5	normal
1	1	0	0	0	1	0	Chapter 5	normal
1	1	1	1	1	1	0	Chapter 5	easy
0	0	1	1	1	1	0	Chapter 5	normal
0	1	1	1	1	1	1	Chapter 5	easy
0	0	1	0	1	0	0	Chapter 5	normal
0	0	1	0	1	0	0	Chapter 5	normal
0	1	1	0	0	1	1	Chapter 5	normal
0	0	0	0	0	0	0	Chapter 5	hard
0	0	1	0	1	1	0	Chapter 5	normal
0	1	0	0	1	1	0	Chapter 5	normal
0	1	1	1	1	1	1	Chapter 5	easy
0	1	1	1	1	1	1	Chapter 5	easy
0	1	1	0	1	1	0	Chapter 5	normal
1	1	1	1	1	1	1	Chapter 5	easy
1	1	0	1	1	0	1	Chapter 5	normal
0	0	1	0	1	0	0	Chapter 5	normal
0	0	0	0	0	0	1	Chapter 5	hard
0	0	1	0	0	1	0	Chapter 5	normal
1	1	1	1	1	1	0	Chapter 5	easy
0	1	1	0	1	1	0	Chapter 5	normal
0	1	1	0	1	1	0	Chapter 5	normal
1	1	1	1	0	1	1	Chapter 5	easy
0	1	1	0	1	1	0	Chapter 5	normal
0	1	1	0	0	0	0	Chapter 5	normal
1	1	1	1	1	1	1	Chapter 5	easy
0	1	1	1	1	1	1	Chapter 5	easy
1	0	1	0	0	0	0	Chapter 6	normal
0	0	1	0	0	1	1	Chapter 6	normal
0	1	1	0	1	1	1	Chapter 6	normal
0	1	1	0	1	1	1	Chapter 6	normal
0	1	1	0	1	1	0	Chapter 6	normal
0	1	1	0	1	1	0	Chapter 6	normal
0	0	0	0	0	0	0	Chapter 6	hard
0	1	1	1	0	1	1	Chapter 6	normal
0	0	0	0	0	0	1	Chapter 6	hard
0	1	1	0	1	1	1	Chapter 6	normal
0	1	1	1	0	0	1	Chapter 6	normal
0	0	1	0	1	1	0	Chapter 6	normal
1	1	1	1	1	1	1	Chapter 6	easy
0	0	0	0	1	0	0	Chapter 6	hard
0	1	1	0	1	0	1	Chapter 6	normal
1	1	1	1	1	1	1	Chapter 6	easy
1	1	1	1	1	0	0	Chapter 6	easy
1	1	1	1	0	0	0	Chapter 6	normal
0	1	1	1	1	1	0	Chapter 6	easy
0	1	1	1	1	1	1	Chapter 6	easy
0	0	0	0	0	0	1	Chapter 6	hard
1	0	1	1	1	1	0	Chapter 6	easy
1	1	0	1	0	0	1	Chapter 6	normal
0	1	1	1	1	0	0	Chapter 6	normal
1	1	1	0	1	1	0	Chapter 6	easy
0	1	1	0	1	1	1	Chapter 6	normal
0	0	1	1	1	0	1	Chapter 6	normal
1	1	1	1	1	1	1	Chapter 6	easy
0	1	0	1	0	1	0	Chapter 6	normal
1	1	1	1	1	1	1	Chapter 6	easy
1	1	1	1	1	1	1	Chapter 6	easy
1	0	0	0	1	1	0	Chapter 6	normal
0	0	0	1	0	1	1	Chapter 6	normal
0	0	0	0	0	1	1	Chapter 6	hard
0	1	1	0	0	1	0	Chapter 6	normal
0	1	1	0	1	1	0	Chapter 6	normal
0	0	1	0	0	0	1	Chapter 6	hard
0	0	1	0	0	0	1	Chapter 6	hard
1	0	1	1	0	1	0	Chapter 6	normal
0	1	1	0	1	1	0	Chapter 6	normal
1	0	1	1	0	1	1	Chapter 6	normal
1	1	1	0	1	1	0	Chapter 6	easy
1	1	1	1	1	0	0	Chapter 6	easy
0	1	1	0	1	1	0	Chapter 6	normal
0	0	1	0	0	1	1	Chapter 6	normal
0	0	0	0	0	0	0	Chapter 6	hard
0	1	1	1	1	1	1	Chapter 6	easy
1	1	1	1	1	1	1	Chapter 6	easy
1	1	1	1	1	1	1	Chapter 6	easy
0	0	1	0	1	0	0	Chapter 6	normal
0	0	1	0	1	1	0	Chapter 6	normal
0	0	1	0	0	1	0	Chapter 6	normal
0	1	1	0	1	1	1	Chapter 6	normal
0	1	1	0	1	1	1	Chapter 6	normal
0	1	1	1	0	1	0	Chapter 6	normal
0	1	1	1	1	1	1	Chapter 6	easy
0	1	1	0	0	1	0	Chapter 6	normal
0	1	1	0	1	1	0	Chapter 6	normal
1	1	0	1	1	1	1	Chapter 6	easy
0	1	1	1	1	1	1	Chapter 6	easy
0	1	1	0	1	1	1	Chapter 6	normal
0	1	1	0	1	1	0	Chapter 6	normal
0	1	1	1	0	1	0	Chapter 6	normal
0	1	1	1	1	1	1	Chapter 6	easy
1	1	1	1	1	1	1	Chapter 6	easy
1	1	1	1	1	1	1	Chapter 6	easy
0	1	1	0	1	1	1	Chapter 6	normal
0	1	1	0	1	1	0	Chapter 6	normal
0	1	1	0	0	1	0	Chapter 6	normal
0	1	1	0	1	1	1	Chapter 6	normal
0	1	1	0	1	1	0	Chapter 6	normal
0	0	0	0	1	1	1	Chapter 6	normal
0	1	0	0	1	1	1	Chapter 6	normal
0	1	1	0	1	1	0	Chapter 6	normal
0	1	1	0	1	1	1	Chapter 6	normal
0	1	1	1	1	1	0	Chapter 6	easy
1	1	1	1	1	1	1	Chapter 6	easy
0	0	0	0	0	0	0	Chapter 6	hard
1	1	1	1	1	1	1	Chapter 6	easy
1	1	1	1	0	1	1	Chapter 6	easy
0	1	1	1	1	1	0	Chapter 6	easy
0	1	0	0	0	1	0	Chapter 6	normal
0	0	0	0	0	0	1	Chapter 6	hard
0	0	0	1	1	0	1	Chapter 6	normal
0	1	0	0	0	1	1	Chapter 6	normal
0	1	1	0	1	1	0	Chapter 6	normal
0	1	1	0	1	1	1	Chapter 6	normal
0	1	1	0	1	1	0	Chapter 6	normal
0	1	1	1	0	0	1	Chapter 6	normal
0	1	1	0	0	1	0	Chapter 6	normal
1	0	0	1	1	1	0	Chapter 6	normal
0	1	1	0	1	1	1	Chapter 6	normal
0	1	0	0	0	1	1	Chapter 6	normal
0	1	1	0	1	1	1	Chapter 6	normal
0	1	1	0	1	1	1	Chapter 6	normal
0	0	1	0	0	1	1	Chapter 6	normal
0	1	1	0	0	0	0	Chapter 6	normal
0	1	1	0	1	1	0	Chapter 6	normal
0	0	1	0	0	1	1	Chapter 6	normal
0	1	1	0	1	1	1	Chapter 6	normal
0	0	0	1	0	0	1	Chapter 6	hard
1	1	1	1	1	1	1	Chapter 6	easy
0	1	1	0	0	1	1	Chapter 6	normal
0	0	0	0	0	0	1	Chapter 6	hard
0	0	1	0	1	0	0	Chapter 6	normal
0	0	0	0	1	0	1	Chapter 6	hard
1	1	1	1	0	1	1	Chapter 6	easy
1	1	1	0	1	0	1	Chapter 6	normal
0	1	0	0	0	0	0	Chapter 6	hard
0	1	1	0	0	1	0	Chapter 6	normal
0	0	0	0	0	1	0	Chapter 6	hard
0	1	1	0	1	1	0	Chapter 6	normal
1	1	1	0	0	1	1	Chapter 6	normal
0	1	0	0	1	0	1	Chapter 6	normal
0	0	0	1	0	0	0	Chapter 6	hard
1	1	0	0	0	0	1	Chapter 6	normal
0	1	1	1	1	0	0	Chapter 6	normal
1	1	1	1	1	1	0	Chapter 6	easy
1	1	1	1	0	1	0	Chapter 6	easy
1	1	1	0	0	1	0	Chapter 6	normal
0	1	0	0	1	1	1	Chapter 6	normal
0	1	0	0	0	0	1	Chapter 6	hard
0	1	0	0	0	0	1	Chapter 6	hard
0	0	1	1	0	0	0	Chapter 3	normal
0	0	1	0	1	1	1	Chapter 3	normal
1	1	1	1	0	1	0	Chapter 3	easy
1	1	1	1	1	1	0	Chapter 3	easy
1	1	0	1	0	0	1	Chapter 3	normal
0	1	0	0	1	1	1	Chapter 3	normal
0	1	0	0	0	0	0	Chapter 3	hard
0	0	0	0	0	0	0	Chapter 3	hard
1	1	1	1	1	1	0	Chapter 3	easy
1	1	1	1	1	1	0	Chapter 3	easy
0	1	1	0	0	1	1	Chapter 3	normal
1	1	1	1	1	1	1	Chapter 3	easy
1	1	1	1	1	1	1	Chapter 3	easy
1	0	1	1	1	1	0	Chapter 5	easy
1	1	0	1	1	1	1	Chapter 5	easy
1	1	1	1	1	1	0	Chapter 5	easy
1	0	0	1	0	0	0	Chapter 5	normal
0	0	1	1	0	0	1	Chapter 5	normal
0	0	0	0	0	0	0	Chapter 5	hard
0	1	1	0	1	1	0	Chapter 5	normal
0	0	1	0	0	1	0	Chapter 5	normal
0	1	1	1	1	1	0	Chapter 5	easy
0	0	0	0	0	0	0	Chapter 5	hard
1	1	1	1	1	1	0	Chapter 5	easy
1	1	1	1	1	1	1	Chapter 5	easy
0	1	1	1	1	1	0	Chapter 5	easy
1	1	1	0	0	1	0	Chapter 5	normal
0	1	1	0	1	1	0	Chapter 5	normal
0	1	1	0	1	0	1	Chapter 5	normal
1	1	1	1	1	1	0	Chapter 5	easy
1	1	1	1	1	1	0	Chapter 5	easy
1	1	1	0	1	1	0	Chapter 5	easy
1	0	1	1	1	0	0	Chapter 5	normal
0	1	1	0	1	1	1	Chapter 5	normal
1	1	1	1	1	1	0	Chapter 5	easy
0	1	0	0	0	1	1	Chapter 5	normal
0	1	1	0	1	1	0	Chapter 5	normal
0	1	1	0	0	1	0	Chapter 5	normal
1	0	1	0	1	1	1	Chapter 5	normal
0	1	0	1	1	1	0	Chapter 5	normal
1	0	0	1	0	0	0	Chapter 5	normal
1	1	1	1	1	1	0	Chapter 5	easy
1	1	1	1	1	1	1	Chapter 5	easy
1	1	1	0	1	1	1	Chapter 6	easy
1	1	1	1	1	1	0	Chapter 6	easy
1	1	1	0	0	0	0	Chapter 6	normal
0	1	1	1	1	1	1	Chapter 6	easy
1	1	1	1	1	1	0	Chapter 6	easy
1	1	1	0	1	1	1	Chapter 6	easy
1	0	0	1	1	0	1	Chapter 6	normal
0	1	1	0	1	1	1	Chapter 6	normal
1	1	0	0	1	0	1	Chapter 6	normal
1	1	1	1	1	1	0	Chapter 6	easy
1	1	0	1	0	1	1	Chapter 6	normal
0	1	1	0	1	1	1	Chapter 6	normal
0	1	1	1	1	1	1	Chapter 6	easy
0	1	1	0	1	1	0	Chapter 6	normal
0	1	1	1	1	1	0	Chapter 6	easy
1	1	0	0	0	0	1	Chapter 6	normal
1	1	1	1	1	1	0	Chapter 6	easy
0	1	1	0	1	1	1	Chapter 6	normal
1	1	1	1	1	1	0	Chapter 6	easy
1	0	0	1	0	1	0	Chapter 6	normal
0	0	0	0	0	0	1	Chapter 6	hard
0	0	1	0	1	1	0	Chapter 6	normal
1	1	1	1	1	1	1	Chapter 6	easy
0	1	1	0	1	0	0	Chapter 6	normal
0	1	1	0	1	1	1	Chapter 6	normal
0	1	1	1	1	1	0	Chapter 6	easy
0	0	1	0	1	1	0	Chapter 6	normal
1	1	1	1	1	1	1	Chapter 6	easy
0	0	0	0	0	0	0	Chapter 6	hard
1	0	0	1	1	0	0	Chapter 6	normal
1	1	1	1	1	1	0	Chapter 6	easy
1	0	1	1	1	0	0	Chapter 6	normal
0	1	1	1	1	1	0	Chapter 6	easy
1	1	1	1	1	0	0	Chapter 6	easy
0	1	0	1	0	0	0	Chapter 6	normal
1	1	1	1	1	1	1	Chapter 6	easy
1	1	1	1	1	1	1	Chapter 6	easy
1	1	1	0	1	1	1	Chapter 6	easy
0	1	0	1	0	1	1	Chapter 6	normal
1	1	1	1	1	1	0	Chapter 6	easy
1	1	1	1	1	1	0	Chapter 6	easy
1	1	1	0	1	1	0	Chapter 6	easy
0	1	1	0	1	1	1	Chapter 6	normal
0	1	0	1	0	1	1	Chapter 6	normal
1	1	0	1	0	1	0	Chapter 6	normal
0	1	1	0	1	1	1	Chapter 6	normal
0	1	1	0	1	1	0	Chapter 6	normal
0	1	1	1	1	1	1	Chapter 6	easy
0	1	1	1	1	1	0	Chapter 6	easy
0	1	1	0	1	1	0	Chapter 6	normal
0	1	1	0	1	1	0	Chapter 6	normal
1	1	1	0	1	1	1	Chapter 6	easy
1	1	1	1	0	1	0	Chapter 6	easy
1	1	0	1	1	1	1	Chapter 6	easy
1	1	1	0	1	1	0	Chapter 6	easy
0	1	1	0	1	1	1	Chapter 6	normal
1	1	1	1	1	1	1	Chapter 6	easy
0	1	0	1	0	0	0	Chapter 6	normal
0	0	1	0	1	1	1	Chapter 6	normal
0	1	1	0	1	1	1	Chapter 6	normal
0	1	1	0	1	1	1	Chapter 6	normal
1	1	0	0	1	0	1	Chapter 6	normal
0	1	1	1	1	1	1	Chapter 6	easy
0	1	1	1	1	1	0	Chapter 6	easy
0	1	1	0	1	1	0	Chapter 6	normal
0	1	1	0	1	0	0	Chapter 6	normal
208	291	294	227	269	285	207

## Sheet: Open-QA (G-Eval)
Excel_line	GPT-4	Bard	Claude-2.0	LLaMa-2	ERNIE-Bot-4.0	Qwen-Max	Chapter	Difficulty
1	0.4	0.3	0.55	0.3	0.35	0.17	Chapter 3	normal
2	0.7	0.7	0.54	0.55	0.55	0.4	Chapter 3	easy
3	0.65	0.37	0.25	0.28	0.1	0.6	Chapter 3	easy
4	0.18	0.1	0.5	0.14	0.5	0.3	Chapter 3	hard
5	0.1	0.1	0.25	0.1	0	0.25	Chapter 3	hard
6	0.3	0.1	0.86	0.3	0.3	0.2	Chapter 3	normal
7	0.17	0.25	0.2	0.1	0.18	0.16	Chapter 3	normal
8	0.35	0.2	0.26	0.75	0.65	0.4	Chapter 3	easy
9	0.3	0.2	0.27	0.1	0.3	0.47	Chapter 3	easy
10	0.2	0.2	0.3	0.2	0.2	0.11	Chapter 3	hard
11	0	0.06	0.4	0.2	0.16	0.4	Chapter 3	hard
12	0.7	0.3	0.6	0.05	0.3	0.21	Chapter 3	normal
13	0.2	0.15	0.18	0.15	0	0.1	Chapter 3	hard
14	0.2	0.45	0.62	0.25	0.1	0.5	Chapter 4	normal
15	0.6	0.52	0.2	0	0.2	0.05	Chapter 4	hard
16	0.35	0.1	0.55	0.45	0.75	0.48	Chapter 4	normal
17	0.5	0.3	0.26	0.5	0.25	0.7	Chapter 4	easy
18	0.65	0.68	0.54	0.4	0.53	0.6	Chapter 4	easy
19	0.43	0.42	0.75	0.1	0.15	0.3	Chapter 4	normal
20	0.78	0.39	0.7	0.15	0.52	0.9	Chapter 4	normal
21	0.63	0.62	0.3	0.1	0.52	0.32	Chapter 4	easy
22	0.08	0.1	0.2	0.25	0.1	0.15	Chapter 4	normal
23	0.3	0.2	0.5	0.1	0.3	0.3	Chapter 4	normal
24	0.92	0.65	0.33	0.35	0.85	0.5	Chapter 4	easy
25	0.84	0.2	0.87	0.2	0.2	0.54	Chapter 4	easy
26	0.15	0.2	0.45	0.1	0.1	0.2	Chapter 4	normal
27	0.32	0.35	0.4	0.15	0.15	0.5	Chapter 4	easy
28	0.3	0.15	0.25	0.15	0.5	0.25	Chapter 4	easy
29	0.1	0.1	0.2	0	0.05	0.15	Chapter 4	easy
30	0.3	0.25	0.35	0.2	0.24	0.42	Chapter 4	normal
31	0.64	0.9	0.57	0.6	0.85	0.66	Chapter 4	easy
32	0.9	0.15	0.33	0.14	0.75	0.62	Chapter 4	easy
33	0.1	0.26	0.16	0.2	0.2	0.2	Chapter 4	normal
34	0.34	0.34	0.25	0.1	0.2	0.15	Chapter 4	normal
35	0.4	0.46	0.2	0.2	0.1	0.45	Chapter 4	normal
36	0.28	0.3	0.2	0.15	0.05	0.31	Chapter 4	hard
37	0.3	0.02	0.2	0.1	0.05	0.2	Chapter 4	normal
38	0.6	0.11	0.81	0.1	0.1	0.38	Chapter 4	hard
39	0.5	0.4	0.65	0.7	0.8	0.6	Chapter 4	easy
40	0.3	0.28	0.2	0.17	0.16	0.35	Chapter 4	easy
41	0.33	0.42	0.46	0.27	0.34	0.58	Chapter 4	normal
42	0.1	0.2	0.15	0.1	0	0.2	Chapter 4	normal
43	0.23	0.4	0.2	0.2	0.7	0.3	Chapter 4	easy
44	0.65	0	0.84	0.55	0.2	0.6	Chapter 4	normal
45	0.57	0.25	0.55	0.57	0.65	0.59	Chapter 4	normal
46	0.1	0.85	0.39	0.1	0.15	0.6	Chapter 4	normal
47	0.15	0.1	0.35	0.1	0.2	0.25	Chapter 4	normal
48	0.26	0.3	0.23	0	0.15	0.3	Chapter 4	normal
49	0.4	0.23	0.36	0.15	0.4	0.65	Chapter 4	easy
50	0.83	0.63	0.85	0.35	0.26	0.6	Chapter 4	easy
51	0.3	0.23	0.54	0.1	0.41	0.18	Chapter 4	hard
52	0.15	0.25	0.2	0.21	0.6	0.3	Chapter 4	easy
53	0.53	0.66	0.58	0.1	0.55	0.42	Chapter 4	normal
54	0.79	0.2	0.35	0.45	0.56	0.25	Chapter 4	easy
55	0.3	0.35	0.45	0.2	0.1	0.45	Chapter 4	easy
56	0.3	0.28	0.28	0.2	0.15	0.2	Chapter 4	easy
57	0.24	0.2	0.13	0.05	0.42	0.28	Chapter 4	easy
58	0.4	0.19	0.65	0.4	0.25	0.4	Chapter 4	normal
59	0.2	0.15	0.5	0.3	0.6	0.54	Chapter 4	easy
60	0.1	0.16	0.2	0.15	0.1	0.5	Chapter 4	normal
61	0.2	0.2	0.1	0.3	0.81	0.25	Chapter 4	normal
62	0.45	0.28	0.27	0.2	0.22	0.17	Chapter 4	hard
63	0.25	0.17	0.11	0.2	0.2	0.3	Chapter 4	easy
64	0.5	0.05	0.2	0.35	0.7	0.4	Chapter 5	normal
65	0.31	0.3	0.1	0.1	0.3	0.4	Chapter 5	normal
66	0.58	0.3	0.36	0.3	0.1	0.48	Chapter 5	normal
67	0.16	0.2	0.24	0.2	0.18	0.05	Chapter 5	normal
68	0.28	0.75	0.25	0.6	0.4	0.4	Chapter 5	easy
69	0.86	0.7	0.9	0	0.05	0.89	Chapter 5	hard
70	0.23	0.35	0.56	0.1	0.1	0.56	Chapter 5	normal
71	0.44	0.25	0.6	0.1	0.4	0.55	Chapter 5	normal
72	0.23	0.23	0.2	0.05	0.1	0.16	Chapter 5	normal
73	0.6	0.2	0.25	0.15	0.08	0.58	Chapter 5	normal
74	0.4	0.43	0.5	0.3	0.15	0.2	Chapter 5	normal
75	0.15	0.1	0.25	0.1	0	0.3	Chapter 5	normal
76	0.17	0.1	0.3	0.05	0.3	0.05	Chapter 5	normal
77	0.2	0.3	0.2	0.19	0.05	0.2	Chapter 5	normal
78	0.28	0.3	0.16	0.1	0.25	0.2	Chapter 5	normal
79	0.8	0.87	0.76	0.23	0.4	0.65	Chapter 5	easy
80	0.11	0.64	0.6	0.2	0.83	0.72	Chapter 5	normal
81	0.52	0.18	0.83	0.1	0.29	0.66	Chapter 5	normal
82	0.1	0.29	0.4	0.2	0.9	0.25	Chapter 5	easy
83	0.14	0.1	0.16	0.1	0.2	0.25	Chapter 5	easy
84	0.86	0.85	0.95	0.9	1	0.9	Chapter 5	easy
85	0.35	0.7	0.65	0.35	0.4	0.6	Chapter 5	easy
86	0.68	0.9	0.9	0.7	0.7	0.78	Chapter 5	easy
87	0.54	0.26	0.56	0.07	0	0.19	Chapter 5	normal
88	0.2	0	0.15	0.1	0.05	0	Chapter 5	hard
89	0.3	0.2	0.19	0.1	0.1	0.1	Chapter 5	easy
90	0.6	0.15	0.16	0.1	0.1	0	Chapter 5	hard
91	0.26	0.45	0.26	0.2	0.29	0.5	Chapter 5	easy
92	0.3	0.2	0.61	0.45	0.5	0.4	Chapter 5	easy
93	0.2	0.17	0.15	0.1	0.5	0.65	Chapter 5	easy
94	0.7	0.6	0.1	0.7	0.7	0.2	Chapter 5	normal
95	0.97	0.81	0.9	0.7	0.86	0.8	Chapter 5	easy
96	0.3	0.52	0.72	0.2	0.55	0.34	Chapter 5	easy
97	0.58	0.1	0.3	0.16	0.25	0.3	Chapter 5	normal
98	0.3	0.3	0.26	0.15	0.3	0.22	Chapter 5	easy
99	0.2	0.2	0.2	0	0.1	0.34	Chapter 5	hard
100	0.1	0.45	0.3	0.35	0.25	0.1	Chapter 5	hard
101	0.26	0.1	0.1	0.1	0.1	0.2	Chapter 5	hard
102	0.56	0.6	0.5	0.35	0.3	0.62	Chapter 5	hard
103	0.32	0.4	0.4	0.27	0.35	0.36	Chapter 5	normal
104	0.13	0.25	0.28	0.1	0.1	0.42	Chapter 5	hard
105	0.75	0.57	0.5	0.1	0.32	0.56	Chapter 5	normal
106	0.26	0.2	0.1	0.55	0	0.3	Chapter 5	normal
107	0.25	0.74	0.3	0.1	0.2	0.2	Chapter 5	normal
108	0.5	0.65	0.6	0.2	0.74	0.56	Chapter 5	normal
109	0.3	0	0.2	0.2	0.12	0.2	Chapter 5	normal
110	0.2	0.3	0.55	0.1	0.3	0.55	Chapter 5	easy
111	0.25	0.27	0.12	0.1	0.35	0.3	Chapter 5	easy
112	0.48	0.3	0.31	0.7	0.4	0.43	Chapter 5	normal
113	0.08	0.35	0.5	0.1	0.35	0.24	Chapter 5	hard
114	0.2	0.4	0.2	0.3	0.2	0.25	Chapter 5	normal
115	0.36	0.1	0.2	0.1	0.2	0.24	Chapter 5	normal
116	0.17	0.15	0.3	0.16	0.3	0.02	Chapter 5	normal
117	0.67	0.25	0.8	0.1	0.6	0.2	Chapter 5	normal
118	0.15	0.4	0.32	0.2	0.21	0.3	Chapter 5	normal
119	0.75	0.6	0.88	0.75	0.63	0.77	Chapter 5	normal
120	0.15	0.23	0.5	0.25	0.22	0.12	Chapter 5	normal
121	0.26	0.6	0.3	0.1	0.2	0.2	Chapter 5	normal
122	0.46	0.28	0.7	0.1	0.22	0.75	Chapter 5	easy
123	0.78	0.75	0.7	0.6	0.1	0.47	Chapter 5	easy
124	0.26	0.2	0.3	0.25	0.1	0.2	Chapter 5	easy
125	0.2	0.33	0.16	0.12	0.25	0.6	Chapter 5	easy
126	0.26	0.75	0.7	0.3	0.55	0.76	Chapter 5	easy
127	0.74	0.86	0.6	0.45	0.85	0.8	Chapter 5	easy
128	0.2	0.2	0	0	0.21	0.1	Chapter 5	easy
129	0.35	0.33	0.3	0.1	0.2	0.3	Chapter 5	normal
130	0.8	0.3	0	0.05	0.25	0.87	Chapter 5	hard
131	0.5	0.37	0.36	0.05	0.3	0.56	Chapter 5	easy
132	0.45	0.75	0.2	0	0.2	0.2	Chapter 5	normal
133	0.1	0.1	0	0	0.15	0.2	Chapter 5	normal
134	0.15	0.05	0.1	0.1	0.7	0.17	Chapter 5	easy
135	0.17	0.1	0.16	0	0.29	0.17	Chapter 5	normal
136	0.4	0.2	0.1	0.1	0.2	0.36	Chapter 5	normal
137	0.2	0.35	0.2	0.2	0.1	0.11	Chapter 5	hard
138	0.9	0.65	0.5	0.1	0.3	0.4	Chapter 5	normal
139	0.81	0.06	0.7	0.2	0.14	0.4	Chapter 5	normal
140	0.5	0.3	0.4	0.5	0.35	0.3	Chapter 5	normal
141	0	0.48	0.05	0.1	0.2	0.15	Chapter 5	hard
142	0.35	0.21	0.22	0.2	0.45	0.1	Chapter 5	easy
143	0.3	0.35	0.2	0.2	0.49	0.21	Chapter 5	normal
144	0.11	0.5	0.2	0.65	0.3	0.78	Chapter 5	normal
145	0.2	0.2	0.2	0.1	0.2	0.1	Chapter 5	normal
146	0.35	0.17	0.14	0.2	0.25	0.6	Chapter 5	normal
147	0.1	0.15	0.27	0.3	0.3	0.35	Chapter 5	normal
148	0.5	0.2	0.31	0.35	0.1	0.5	Chapter 5	normal
149	0.11	0.75	0.9	0.05	0.14	0.28	Chapter 5	normal
150	0.2	0.1	0.1	0.1	0	0.28	Chapter 5	hard
151	0.2	0.25	0.1	0.15	0.2	0.2	Chapter 5	normal
152	0.3	0.2	0.2	0.1	0.4	0.3	Chapter 5	normal
153	0.1	0.15	0.27	0.16	0.7	0.1	Chapter 5	easy
154	0.2	0.2	0.3	0.1	0.45	0.3	Chapter 5	normal
155	0.15	0.1	0.2	0.06	0.11	0.4	Chapter 5	normal
156	0.3	0.3	0.56	0.2	0.2	0.45	Chapter 5	normal
157	0.62	0.15	0.73	0.1	0.1	0.78	Chapter 5	normal
158	0.88	0.8	0.5	0.2	0.2	0.55	Chapter 5	normal
159	0.6	0.2	0.65	0.25	0.7	0.1	Chapter 5	hard
160	0.21	0.6	0.53	0.25	0.35	0.2	Chapter 5	easy
161	0.3	0.15	0.59	0.15	0.1	0.16	Chapter 5	normal
162	0.15	0.2	0.27	0.25	0.17	0.2	Chapter 5	hard
163	0.23	0.94	0.83	0.1	0.2	0.2	Chapter 5	hard
164	0.26	0.2	0.28	0.15	0.19	0.18	Chapter 5	normal
165	0.25	0.55	0.83	0.3	0.46	0.6	Chapter 5	hard
166	0	0.05	0.2	0.15	0.1	0.05	Chapter 5	hard
167	0.37	0.25	0.45	0.26	0.2	0.52	Chapter 5	easy
168	0.7	0.4	0.7	0.45	0.2	0.26	Chapter 5	normal
169	0.45	0.26	0.4	0.07	0.6	0.5	Chapter 5	hard
170	0.86	0.4	0.8	0	0	0.83	Chapter 5	normal
171	0.11	0.2	0.15	0.1	0.2	0.2	Chapter 5	hard
172	0.17	0.2	0.08	0.3	0	0.45	Chapter 5	hard
173	0.82	0.92	0.9	0.7	0.62	0.81	Chapter 5	normal
174	0.16	0.12	0.14	0.05	0.27	0.36	Chapter 5	normal
175	0.1	0.1	0.15	0.1	0.1	0.2	Chapter 5	hard
176	0.32	0	0.3	0.11	0.16	0.29	Chapter 5	hard
177	0.1	0.05	0.1	0.6	0.4	0.2	Chapter 5	normal
178	0.4	0.16	0.2	0.2	0.2	0.38	Chapter 5	normal
179	0.2	0.3	0.85	0.2	0.7	0.25	Chapter 5	easy
180	0.5	0.75	0.15	0.7	0.6	0.3	Chapter 5	normal
181	0.14	0.1	0.2	0.1	0.87	0.07	Chapter 5	hard
182	0.75	0.2	0.7	0.25	0.3	0.2	Chapter 5	normal
183	0.6	0.46	0.4	0.16	0.4	0.45	Chapter 5	easy
184	0.85	0.3	0.8	0.25	0.46	0.3	Chapter 5	normal
185	0.3	0.15	0.6	0.1	0.5	0.55	Chapter 5	normal
186	0.47	0.16	0.35	0.15	0.3	0.5	Chapter 5	normal
187	0.3	0.14	0.35	0	0.2	0.2	Chapter 5	normal
188	0.2	0.1	0.4	0.1	0.15	0.42	Chapter 6	normal
189	0.2	0.3	0.2	0.15	0.2	0.19	Chapter 6	normal
190	0.3	0.2	0.5	0.3	0.2	0.48	Chapter 6	hard
191	0.7	0.57	0.6	0.85	0.25	0.47	Chapter 6	easy
192	0.15	0.3	0.36	0.2	0.1	0.29	Chapter 6	hard
193	0.4	0.31	0.55	0.15	0.36	0.32	Chapter 6	easy
194	0.78	0.18	0.1	0.1	0.1	0.3	Chapter 6	normal
195	0.3	0.1	0.1	0.15	0.2	0.31	Chapter 6	normal
196	0.36	0.35	0.4	0.1	0.57	0.45	Chapter 6	normal
197	0.5	0.1	0.7	0.1	0.34	0.6	Chapter 6	normal
198	0.2	0.1	0.2	0.2	0.3	0.2	Chapter 6	normal
199	0.2	0.78	0.5	0.1	0.1	0.82	Chapter 6	normal
200	0.3	0.72	0.9	0.2	0.8	0.4	Chapter 6	easy
201	0.88	0.05	0.8	0.15	0.86	0.52	Chapter 6	normal
202	0.53	0.17	0.75	0.1	0.3	0.2	Chapter 6	hard
203	0.35	0.15	0.3	0.15	0.39	0.41	Chapter 6	hard
204	0.3	0.395	0.45	0.17	0.26	0.6	Chapter 6	hard
205	0.2	0.2	0.21	0.2	0.26	0.2	Chapter 6	normal
206	0.9	0.1	0.37	0.05	0.1	0.5	Chapter 6	hard
207	0.12	0.92	0.93	0.05	0.2	0.05	Chapter 6	hard
208	0.36	0.2	0.76	0.05	0.2	0.7	Chapter 6	hard
209	0.21	0.2	0.1	0.1	0.16	0.12	Chapter 6	normal
210	0.2	0.25	0.25	0.16	0.3	0.2	Chapter 6	normal
211	0.2	0.2	0.2	0.25	0.2	0.2	Chapter 6	normal
212	0.76	0.28	0.11	0.2	0.1	0.2	Chapter 6	normal
213	0	0	0.25	0.1	0.2	0.31	Chapter 6	normal
214	0.4	0.2	0.4	0.25	0.05	0.23	Chapter 6	normal
215	0.2	0.12	0.3	0.1	0.3	0.15	Chapter 6	normal
216	0.07	0.1	0.15	0.05	0	0.12	Chapter 6	hard
217	0.32	0.1	0.3	0.2	0.2	0.28	Chapter 6	hard
218	0.87	0.86	0.39	0.1	0.3	0.1	Chapter 6	easy
219	0.1	0	0.2	0.1	0.16	0.13	Chapter 6	hard
220	0.05	0.25	0.11	0.4	0.2	0.66	Chapter 6	hard
221	0.1	0.3	0.46	0.1	0.16	0.35	Chapter 6	easy
222	0.3	0.46	0.42	0.25	0.34	0.78	Chapter 6	easy
223	0.13	0.4	0.61	0.4	0.58	0.65	Chapter 6	easy
224	0.15	0.1	0.1	0.1	0.1	0.2	Chapter 6	normal
225	0.1	0.1	0.35	0.1	0.11	0.2	Chapter 6	hard
226	0.2	0.05	0.13	0.45	0.1	0.25	Chapter 6	hard
227	0.2	0.2	0.2	0.1	0.1	0.15	Chapter 6	normal
228	0.13	0.15	0.62	0.1	0	0.2	Chapter 6	hard
229	0.6	0.5	0.6	0.3	0.2	0.68	Chapter 6	hard
230	0.15	0.02	0.1	0.18	0.1	0.06	Chapter 6	hard
231	0.2	0.16	0.15	0.2	0.35	0.18	Chapter 6	normal
232	0.4	0.6	0.85	0.1	0.55	0.7	Chapter 6	hard
233	0.16	0	0.12	0.1	0.1	0.27	Chapter 6	hard
234	0.88	0.22	0.27	0.5	0.05	0.1	Chapter 6	hard
235	0.66	0.39	0.25	0.65	0.16	0.3	Chapter 6	easy
236	0.34	0.64	0.2	0.26	0.45	0.7	Chapter 6	easy
237	0.23	0.67	0.65	0.25	0.35	0.38	Chapter 6	hard
238	0.68	0.43	0.3	0.24	0.3	0.5	Chapter 6	normal
239	0.9	0.21	0.3	0.2	0	0.34	Chapter 6	normal
240	0.45	0.2	0.1	0.1	0.15	0.2	Chapter 6	normal
241	0.55	0.29	0.18	0.15	0.35	0.42	Chapter 6	hard
242	0.25	0.25	0.62	0.15	0.25	0.2	Chapter 6	hard
243	0.49	0.46	0.34	0	0	0.37	Chapter 6	hard
244	0.9	0.19	0.1	0.9	0.1	0.31	Chapter 6	normal
245	0.85	0.93	0.9	0.87	0.83	0.6	Chapter 6	easy
246	0.86	0.88	0.06	0.15	0.26	0.45	Chapter 6	hard
247	0.1	0.38	0.3	0.2	0.16	0.62	Chapter 6	normal
248	0.25	0.2	0.2	0.2	0.16	0.1	Chapter 6	normal
249	0.37	0.15	0.25	0.2	0.2	0.35	Chapter 6	normal
250	0.12	0.4	0.7	0.2	0.26	0.5	Chapter 6	normal
251	0.1	0.2	0.42	0.1	0.2	0.18	Chapter 6	hard
252	0.15	0.2	0.4	0.1	0.6	0.19	Chapter 6	hard
253	0.2	0.32	0.25	0.05	0.17	0.62	Chapter 6	normal
254	0.31	0.2	0.2	0.1	0.3	0.76	Chapter 6	hard
255	0.35	0.7	0.2	0.35	0.5	0.7	Chapter 6	easy
256	0.56	0.2	0.4	0.2	0.1	0.2	Chapter 6	normal
257	0.58	0.1	0.1	0.19	0.46	0.17	Chapter 6	easy
258	0.21	0.24	0.24	0.1	0.17	0.1	Chapter 6	hard
259	0.3	0.12	0.1	0.2	0.3	0.4	Chapter 6	normal
260	0.35	0.23	0.15	0.4	0.37	0.5	Chapter 6	easy
261	0.57	0.2	0.84	0.2	0.2	0.36	Chapter 6	normal
262	0.08	0.1	0.3	0.1	0	0.2	Chapter 6	hard
263	0.1	0.03	0.2	0.1	0.25	0.12	Chapter 6	hard
264	0.25	0.2	0.1	0.15	0	0.42	Chapter 6	normal
265	0.3	0.12	0.2	0.3	0.2	0.24	Chapter 6	normal
266	0.54	0.2	0.3	0.25	0.2	0.15	Chapter 6	normal
267	0.39	0.3	0.16	0	0.1	0.1	Chapter 6	hard
268	0.15	0.1	0.2	0.1	0.1	0.1	Chapter 6	hard
269	0.2	0.17	0.85	0.2	0.2	0.48	Chapter 6	hard
270	0.25	0.2	0.3	0.1	0.1	0.2	Chapter 3	hard
271	0.17	0.15	0.1	0.2	0.15	0.11	Chapter 3	hard
272	0.1	0.32	0.3	0.1	0.28	0.39	Chapter 3	hard
273	0.15	0.15	0.32	0.25	0.2	0.15	Chapter 3	normal
274	0.15	0.1	0.1	0.1	0	0.1	Chapter 3	hard
275	0.3	0.1	0.5	0.2	0.1	0.35	Chapter 3	hard
276	0.7	0.49	0.3	0	0.53	0.55	Chapter 3	normal
277	0.13	0.2	0.23	0.1	0.14	0.55	Chapter 3	hard
278	0.15	0.3	0.1	0.05	0.24	0.2	Chapter 4	normal
279	0.9	0.66	0.2	0.2	0.05	0.1	Chapter 4	hard
280	0.2	0.39	0.2	0.15	0.56	0.4	Chapter 4	normal
281	0.4	0.15	0.4	0.3	0.7	0.3	Chapter 4	normal
282	0.2	0.32	0.7	0.2	0.55	0.55	Chapter 4	normal
283	0.28	0.2	0.3	0.25	0.56	0.6	Chapter 4	normal
284	0.2	0.36	0.07	0.05	0.1	0.2	Chapter 4	normal
285	0.15	0.05	0.26	0.5	0.2	0.17	Chapter 4	hard
286	0.5	0.95	0.55	1	0.9	1	Chapter 4	easy
287	1	1	0.5	1	0.95	0.57	Chapter 4	normal
288	0.38	0.75	0.51	0.25	0.21	0.3	Chapter 4	normal
289	0.6	0.6	0.5	0.1	0.3	0.6	Chapter 4	easy
290	1	1	0.9	0.2	1	1	Chapter 4	normal
291	0.95	0.8	0.1	1	0.86	1	Chapter 4	easy
292	0.5	0.6	0.2	0.2	0.2	0.4	Chapter 4	easy
293	0.41	0.3	0.6	0.2	0.36	0.2	Chapter 4	normal
294	0.3	0.24	0.3	0.3	0.15	0.45	Chapter 4	normal
295	0.11	0.1	0.9	0.2	0.06	0.2	Chapter 4	hard
296	0.36	0.4	0.4	0.45	0.6	0.4	Chapter 5	normal
297	0.59	0.59	0.15	0.1	0.2	0.2	Chapter 5	normal
298	0.11	0.22	0.3	0.1	0.2	0.2	Chapter 5	hard
299	0.12	0.25	0.23	0.45	0.42	0.2	Chapter 5	normal
300	0.17	0.37	0.28	0.1	0.1	0	Chapter 5	normal
301	0.3	0.27	0.3	0.3	0.46	0.3	Chapter 5	easy
302	0.5	0.49	0.3	0.15	0.19	0.4	Chapter 5	normal
303	0.3	0.3	0.41	0.2	0.15	0.42	Chapter 5	hard
304	0.2	0.38	0.3	0.2	0.27	0.25	Chapter 5	easy
305	0.65	0.2	0.9	0.65	0.6	0.49	Chapter 5	easy
306	0.4	0.2	0.49	0.56	0.34	0.4	Chapter 5	easy
307	0.2	0.3	0.25	0.3	0.2	0.1	Chapter 5	hard
308	0.3	0.25	0.1	0.1	0.5	0.32	Chapter 5	normal
309	0.7	0.3	0.5	0.35	0.2	0.1	Chapter 5	normal
310	0.55	0.27	0.2	0.15	0.1	0.4	Chapter 5	normal
311	0.25	0.25	0.4	0.2	0.5	0.25	Chapter 5	normal
312	0.85	0.6	0.84	0.15	0.87	0.95	Chapter 5	easy
313	0.7	0.36	0.45	0.1	0.52	0.38	Chapter 5	normal
314	0.45	0.38	0.21	0.2	0.2	0.2	Chapter 5	normal
315	0.65	0.4	0.7	0.46	0.7	0.61	Chapter 5	normal
316	0.26	0.2	0.25	0.1	0.15	0.45	Chapter 5	normal
317	0.45	0.4	0.55	0.45	0.2	0.5	Chapter 5	hard
318	0.56	0.2	0.5	0.2	0.5	0.68	Chapter 5	normal
319	0.6	0.17	0.4	0	0.3	0.2	Chapter 5	hard
320	0.3	0.1	0.28	0.2	0.2	0.61	Chapter 5	hard
321	0.15	0.1	0.7	0.1	0.1	0.4	Chapter 5	normal
322	0.16	0.3	0.21	0.1	0.5	0.05	Chapter 5	normal
323	0.2	0.1	0.3	0.1	0.1	0.15	Chapter 5	hard
324	0.15	0.2	0.1	0.2	0.2	0.4	Chapter 6	normal
325	0.34	0.3	0.63	0.6	0.75	0.65	Chapter 6	easy
326	0.3	0.1	0.5	0.1	0.17	0.35	Chapter 6	hard
327	0.56	0.45	0.38	0.1	0.72	0.4	Chapter 6	normal
328	0.17	0.1	0.3	0.25	0.2	0.2	Chapter 6	hard
329	0.3	0.29	0.4	0.08	0	0.24	Chapter 6	normal
330	0.56	0.4	0.5	0.15	0.2	0.5	Chapter 6	normal
331	0.35	0.5	0.28	0.71	0.6	0.7	Chapter 6	easy
332	0.63	0.75	0.6	0.15	0.1	0.6	Chapter 6	hard
333	0.38	0.53	0.3	0.2	0.3	0.35	Chapter 6	normal
334	0.2	0.3	0.22	0	0.1	0.3	Chapter 6	hard
335	0.66	0.4	0.42	0.16	0.3	0.26	Chapter 6	normal
336	0.31	0.05	0.41	0.5	0.3	0.2	Chapter 6	normal
337	0.58	0.16	0.3	0.2	0.11	0.1	Chapter 6	hard
338	0.4	0.3	0.28	0.2	0.28	0.3	Chapter 6	hard
339	0.25	0.21	0.3	0.19	0.25	0.37	Chapter 6	normal
340	0.3	0.5	0.3	0.3	0.1	0.35	Chapter 6	normal
341	0.2	0.2	0.24	0.05	0.3	0.3	Chapter 6	easy
342	0.6	0.4	0.8	0.16	0.6	0.36	Chapter 6	normal
343	0.15	0.1	0.2	0.1	0.2	0	Chapter 6	hard
344	0.49	0.42	0.45	0.17	0.28	0.6	Chapter 6	normal
345	0.4	0.3	0.1	0.4	0.17	0.25	Chapter 6	easy
346	0.66	0.84	0.62	0.16	0.2	0.5	Chapter 6	normal
347	0.55	0.34	0.13	0.3	0.1	0.2	Chapter 6	hard
348	0.37	0.1	0.2	0.1	0.4	0.42	Chapter 6	hard
349	0.29	0.3	0.48	0.36	0.1	0.15	Chapter 6	normal
350	0.35	0.2	0.3	0.25	0.5	0.55	Chapter 6	easy
351	0.3	0.15	0.3	0.26	0.15	0.4	Chapter 6	normal
352	0.2	0.1	0.04	0.15	0.5	0.15	Chapter 6	normal
353	0.4	0.5	0.48	0.23	0.1	0.2	Chapter 6	easy
354	0.2	0.2	0.45	0.1	0.35	0.2	Chapter 6	easy
355	0.36	0.2	0.25	0.3	0.26	0.2	Chapter 6	easy
356	0.2	0.12	0.3	0.2	0.35	0.5	Chapter 6	easy

## Sheet: Open-QA (expert)
GPT-4-Expert 1	Bard-Expert 1	Claude-2.0-Expert 1	LLaMa-2-Expert 1	ERNIE-Bot-4.0-Expert 1	Qwen-Max-Expert 1	GPT-4-Expert 2	Bard-Expert 2	Claude-2.0-Expert 2	LLaMa-2-Expert 2	ERNIE-Bot-4.0-Expert 2	Qwen-Max-Expert 2	GPT-4-Expert 3	Bard-Expert 3	Claude-2.0-Expert 3	LLaMa-2-Expert 3	ERNIE-Bot-4.0-Expert 3	Qwen-Max-Expert 3	Chapter	Difficulty
8	8	8	9	8	8	7	0	0	8	9	4	7	7	8	7	8	7	Chapter 3	normal
9	9	9	8	10	9	7	7	9	7	9	8	7	7	8	6	9	7	Chapter 3	easy
8	8	8	7	8	8	8	8	8	6	9	8	8	7	9	8	9	10	Chapter 3	easy
5	0	4	4	5	6	6	0	4	4	7	6	6	7	7	7	8	7	Chapter 3	hard
0	0	5	0	0	0	5	0	5	0	0	0	7	6	8	8	4	5	Chapter 3	hard
9	4	8	3	9	2	5	5	5	2	7	4	8	8	8	8	8	7	Chapter 3	normal
6	6	7	6	7	10	8	0	8	5	5	5	7	7	8	8	7	9	Chapter 3	normal
7	7	7	7	7	7	8	8	8	8	7	8	7	7	8	8	8	7	Chapter 3	easy
7	7	8	8	7	8	8	8	9	8	9	8	8	7	8	9	7	8	Chapter 3	easy
2	2	8	5	5	5	8	0	5	4	3	2	7	5	9	6	7	7	Chapter 3	hard
7	0	8	0	0	8	0	6	8	7	0	6	7	8	8	7	8	8	Chapter 3	hard
8	0	8	1	8	8	7	7	7	0	7	8	8	8	9	6	10	9	Chapter 3	normal
0	0	0	0	0	0	7	5	6	4	6	5	6	7	8	8	8	9	Chapter 3	hard
7	7	7	7	6	7	7	6	8	6	5	7	7	8	7	8	7	8	Chapter 4	normal
8	9	8	0	7	8	6	6	4	0	0	0	7	7	6	0	7	8	Chapter 4	hard
5	5	8	0	8	8	4	4	7	5	8	8	7	2	8	6	7	8	Chapter 4	normal
8	8	8	8	8	8	8	8	7	6	5	6	8	7	8	7	5	8	Chapter 4	easy
9	9	9	8	7	10	7	7	8	3	8	8	6	8	8	6	8	9	Chapter 4	easy
5	0	5	5	10	5	4	4	5	6	7	8	6	6	8	7	8	7	Chapter 4	normal
7	7	0	7	7	7	8	4	4	3	6	7	7	6	6	8	9	7	Chapter 4	normal
7	9	8	8	7	7	7	8	8	7	5	7	8	8	8	7	7	8	Chapter 4	easy
8	7	7	7	0	8	7	7	7	0	0	7	7	7	7	8	9	9	Chapter 4	normal
0	7	7	3	7	9	8	4	6	6	7	8	8	8	8	8	8	8	Chapter 4	normal
8	8	8	5	6	6	7	8	8	8	8	8	8	8	8	8	8	7	Chapter 4	easy
8	2	8	8	8	2	8	7	8	8	7	7	8	6	8	7	8	8	Chapter 4	easy
7	3	7	3	7	3	8	7	8	7	8	7	7	8	8	8	8	8	Chapter 4	normal
9	3	9	0	9	9	8	7	8	6	8	7	8	7	8	7	8	8	Chapter 4	easy
7	7	7	7	7	7	8	8	5	5	6	7	8	8	8	8	7	8	Chapter 4	easy
7	7	7	7	7	7	8	8	8	6	8	8	8	7	8	9	8	8	Chapter 4	easy
7	7	7	5	7	7	4	4	8	4	8	8	7	8	8	8	8	8	Chapter 4	normal
8	8	8	8	8	8	7	6	8	7	7	7	8	6	8	8	8	6	Chapter 4	easy
8	7	7	7	8	7	9	5	5	7	8	6	8	6	8	7	8	6	Chapter 4	easy
5	5	5	5	5	5	8	7	6	3	8	8	8	8	7	8	8	8	Chapter 4	normal
7	7	7	7	5	7	7	5	5	5	4	7	8	8	8	8	5	7	Chapter 4	normal
7	7	7	7	0	7	8	6	7	4	0	7	8	7	8	8	8	9	Chapter 4	normal
7	7	0	0	0	0	5	0	6	0	7	5	8	7	6	6	6	7	Chapter 4	hard
7	7	7	6	7	8	7	0	8	5	1	7	8	7	8	8	6	8	Chapter 4	normal
8	7	8	0	1	6	8	0	6	6	4	4	8	7	8	5	5	8	Chapter 4	hard
8	7	7	7	7	7	8	8	7	6	7	6	8	8	8	7	8	8	Chapter 4	easy
7	7	7	7	7	7	8	8	7	6	5	5	8	8	8	8	8	9	Chapter 4	easy
7	7	7	0	7	7	8	5	6	6	7	7	8	8	8	6	8	8	Chapter 4	normal
7	7	7	7	2	6	6	6	6	6	7	7	7	7	7	6	8	8	Chapter 4	normal
7	7	7	8	7	7	5	6	7	6	7	6	8	8	8	7	7	8	Chapter 4	easy
8	0	8	8	8	8	5	3	6	7	6	7	8	7	7	6	7	8	Chapter 4	normal
7	7	6	5	7	8	7	5	4	5	6	6	8	8	8	8	8	8	Chapter 4	normal
7	7	7	7	7	7	5	7	4	4	5	6	8	7	8	8	8	8	Chapter 4	normal
7	7	5	0	4	3	6	5	6	6	6	7	8	8	8	6	8	8	Chapter 4	normal
7	7	7	7	7	7	7	7	7	2	5	7	8	8	7	7	8	7	Chapter 4	normal
7	8	7	7	7	7	8	7	8	7	7	7	8	8	8	7	8	8	Chapter 4	easy
8	7	7	7	6	7	8	8	7	7	7	7	8	8	7	7	8	8	Chapter 4	easy
7	7	7	0	0	0	7	7	7	6	6	6	8	8	7	6	8	8	Chapter 4	hard
7	7	7	7	7	7	7	7	6	5	7	8	8	8	8	8	8	8	Chapter 4	easy
8	8	8	0	8	8	7	5	7	5	6	6	7	8	8	7	8	8	Chapter 4	normal
7	7	7	7	7	7	7	7	7	7	7	7	8	7	8	7	8	9	Chapter 4	easy
8	8	8	8	8	8	7	7	7	7	1	6	8	7	7	7	7	8	Chapter 4	easy
8	7	7	7	7	8	8	8	8	8	0	8	7	7	8	7	7	9	Chapter 4	easy
7	7	7	7	7	7	7	7	7	7	7	7	8	8	8	5	8	6	Chapter 4	easy
7	7	7	7	7	7	7	4	7	6	6	6	7	7	8	8	9	8	Chapter 4	normal
8	8	8	6	8	8	5	7	7	6	6	6	7	7	8	8	7	8	Chapter 4	easy
7	7	0	8	7	7	6	6	0	5	7	7	7	7	5	7	6	8	Chapter 4	normal
8	8	8	8	0	4	7	7	8	7	0	5	8	8	9	7	8	7	Chapter 4	normal
7	7	6	7	7	6	6	7	4	6	6	0	6	6	4	6	6	4	Chapter 4	hard
7	7	7	7	7	7	7	7	7	6	6	6	8	8	8	8	8	9	Chapter 4	easy
7	0	7	7	7	7	7	7	7	7	7	7	6	7	7	8	8	8	Chapter 5	normal
7	7	7	4	7	7	4	6	7	5	6	7	7	7	7	7	9	8	Chapter 5	normal
7	7	7	7	7	7	8	5	6	5	5	7	7	7	6	6	7	8	Chapter 5	normal
7	7	7	7	7	7	2	2	7	7	7	7	7	7	7	7	7	7	Chapter 5	normal
7	7	7	7	7	7	8	7	7	7	7	7	7	7	7	8	8	8	Chapter 5	easy
5	5	5	7	7	0	5	5	5	6	4	6	7	7	7	7	6	7	Chapter 5	hard
6	6	6	6	6	6	5	6	6	7	0	7	7	7	7	7	7	7	Chapter 5	normal
7	7	7	7	7	7	7	6	5	5	6	7	8	7	7	7	7	7	Chapter 5	normal
7	7	7	7	7	7	7	6	7	5	7	7	6	6	6	7	7	8	Chapter 5	normal
7	7	7	7	0	7	7	7	6	6	6	6	7	8	7	8	6	8	Chapter 5	normal
5	5	5	5	4	6	7	6	7	6	2	6	8	7	7	7	6	8	Chapter 5	normal
7	7	7	7	7	7	7	7	7	7	0	6	7	7	7	7	7	7	Chapter 5	normal
7	7	7	7	7	7	7	7	7	6	6	7	6	8	6	8	7	8	Chapter 5	normal
7	7	7	7	0	7	7	5	6	6	5	6	8	8	8	8	7	8	Chapter 5	normal
7	7	7	7	0	7	7	6	6	6	0	6	8	8	8	7	8	8	Chapter 5	normal
7	7	7	7	7	7	7	8	8	4	6	7	8	8	8	6	7	8	Chapter 5	easy
7	7	7	7	7	7	7	6	7	5	6	6	8	8	8	7	8	7	Chapter 5	normal
7	7	7	7	7	7	7	7	7	6	0	6	7	7	8	7	7	7	Chapter 5	normal
7	7	7	7	7	7	8	7	7	7	7	6	8	7	8	7	8	8	Chapter 5	easy
7	7	7	7	7	7	7	7	7	7	7	6	8	7	8	8	7	8	Chapter 5	easy
7	7	7	7	7	7	8	8	8	6	7	7	7	7	8	8	8	8	Chapter 5	easy
7	7	7	7	7	7	8	7	7	7	7	7	8	6	8	8	8	7	Chapter 5	easy
7	7	7	7	7	7	7	8	7	7	7	7	8	7	8	8	8	7	Chapter 5	easy
7	7	7	7	0	7	7	7	7	7	0	7	8	6	8	8	5	8	Chapter 5	normal
0	0	0	0	0	0	8	7	7	6	6	7	8	5	7	8	6	8	Chapter 5	hard
7	7	7	7	7	7	7	8	8	6	7	7	8	7	8	8	8	8	Chapter 5	easy
7	7	7	7	7	7	7	0	0	0	7	4	8	2	6	6	6	6	Chapter 5	hard
7	7	7	7	7	7	8	8	8	8	8	8	8	8	8	8	8	8	Chapter 5	easy
7	7	7	7	7	7	8	8	8	7	8	8	8	8	8	8	8	7	Chapter 5	easy
7	7	7	7	7	7	8	8	8	8	8	8	8	8	8	7	8	8	Chapter 5	easy
7	7	7	7	7	3	5	8	5	7	8	5	8	8	8	8	8	7	Chapter 5	normal
7	7	7	7	7	7	8	8	8	7	7	7	8	8	8	8	8	8	Chapter 5	easy
7	7	7	7	7	7	8	8	8	8	8	8	7	7	7	7	8	8	Chapter 5	easy
0	5	6	4	5	5	7	7	7	7	7	7	7	8	8	6	7	7	Chapter 5	normal
7	7	7	6	7	6	7	7	7	7	7	7	7	8	8	8	8	8	Chapter 5	easy
0	0	0	0	7	3	7	7	7	4	7	7	8	7	8	5	8	8	Chapter 5	hard
0	0	0	0	0	0	8	7	7	7	4	7	8	7	8	7	6	7	Chapter 5	hard
0	0	0	0	0	0	8	6	7	4	7	7	8	7	7	7	7	7	Chapter 5	hard
0	7	0	0	0	0	5	4	5	6	5	7	8	7	8	8	7	7	Chapter 5	hard
7	7	7	6	7	7	7	7	5	5	7	5	7	8	6	6	6	6	Chapter 5	normal
0	0	0	0	7	7	4	4	7	7	7	7	8	7	7	8	8	8	Chapter 5	hard
7	6	6	6	6	7	5	7	7	7	7	7	6	7	8	6	7	6	Chapter 5	normal
5	5	5	5	5	9	7	7	7	6	5	7	7	7	7	8	6	6	Chapter 5	normal
7	7	5	5	5	8	8	8	8	6	0	6	7	7	7	7	7	7	Chapter 5	normal
4	5	7	7	7	7	7	6	7	7	7	7	8	6	8	7	6	8	Chapter 5	normal
7	7	7	7	7	7	5	6	6	6	7	7	7	7	7	6	7	7	Chapter 5	normal
7	7	7	7	7	7	8	8	7	0	8	8	8	6	8	7	8	8	Chapter 5	easy
7	7	7	7	7	7	7	7	7	7	7	7	8	8	8	8	8	8	Chapter 5	easy
7	7	7	7	8	7	3	0	4	5	6	7	7	6	7	7	7	7	Chapter 5	normal
4	4	4	4	5	0	7	7	7	7	7	7	7	7	7	7	7	6	Chapter 5	hard
5	5	5	1	7	6	7	7	7	7	7	7	7	7	7	8	8	7	Chapter 5	normal
7	6	7	7	8	7	7	4	7	5	5	5	5	6	7	6	7	6	Chapter 5	normal
6	7	7	7	7	7	6	6	4	6	6	7	7	7	7	7	8	8	Chapter 5	normal
6	5	7	2	8	5	7	7	7	4	4	7	7	6	7	6	7	7	Chapter 5	normal
7	7	7	7	7	7	6	6	6	6	6	6	6	6	6	6	7	7	Chapter 5	normal
7	7	7	7	7	7	4	5	5	4	4	6	7	7	7	7	7	7	Chapter 5	normal
7	7	7	7	7	7	5	5	5	6	6	6	6	7	7	7	7	7	Chapter 5	normal
7	7	7	7	7	7	7	7	7	7	7	7	7	7	7	7	7	6	Chapter 5	normal
8	8	8	8	8	8	7	7	7	7	7	7	7	7	7	7	6	7	Chapter 5	easy
8	8	8	8	0	8	7	7	7	7	6	7	8	8	8	8	6	8	Chapter 5	easy
8	8	8	8	8	8	7	7	7	6	7	7	7	7	7	7	7	8	Chapter 5	easy
8	8	8	8	8	8	8	8	8	6	8	8	6	7	7	7	7	7	Chapter 5	easy
8	8	8	8	8	8	7	7	7	5	7	8	7	7	7	6	7	7	Chapter 5	easy
8	8	8	8	8	8	7	7	7	7	7	7	7	7	7	7	7	7	Chapter 5	easy
8	8	8	8	8	8	8	7	8	0	9	8	7	7	7	5	7	8	Chapter 5	easy
7	7	7	7	0	7	7	4	7	7	7	8	7	7	7	6	6	7	Chapter 5	normal
7	7	7	0	7	7	8	8	3	3	4	7	7	7	2	2	1	7	Chapter 5	hard
8	8	8	8	8	8	8	7	8	6	7	7	7	6	7	7	6	5	Chapter 5	easy
7	7	7	7	7	7	8	8	7	0	6	8	7	7	7	4	7	7	Chapter 5	normal
7	7	7	7	7	7	8	7	7	7	8	8	6	6	6	6	6	6	Chapter 5	normal
7	7	7	7	7	7	7	7	7	7	7	7	7	7	7	7	7	7	Chapter 5	easy
6	5	6	6	6	7	7	5	7	7	8	8	7	7	6	6	6	6	Chapter 5	normal
7	7	7	7	7	7	7	7	7	6	6	6	7	7	8	5	7	8	Chapter 5	normal
7	7	7	0	0	0	7	7	7	7	7	7	7	7	7	7	7	6	Chapter 5	hard
7	7	7	7	7	7	7	8	8	8	7	6	8	7	6	6	6	6	Chapter 5	normal
7	6	7	7	7	7	7	6	7	7	7	7	8	6	6	6	7	4	Chapter 5	normal
7	7	7	7	7	7	7	7	7	7	7	7	7	6	6	6	7	6	Chapter 5	normal
1	7	7	1	1	1	8	7	7	6	6	7	6	7	6	6	6	6	Chapter 5	hard
7	7	7	7	7	7	8	8	8	8	8	8	7	7	7	7	7	7	Chapter 5	easy
8	8	8	0	9	8	8	8	7	7	8	7	7	7	7	4	6	5	Chapter 5	normal
7	5	8	7	7	7	8	5	5	7	7	7	7	6	8	8	8	7	Chapter 5	normal
7	7	0	7	7	7	7	7	7	7	7	7	7	8	3	3	7	7	Chapter 5	normal
7	0	7	7	7	7	7	7	7	7	7	8	7	7	8	7	7	7	Chapter 5	normal
7	6	7	6	6	6	7	7	7	7	7	7	7	7	7	5	8	7	Chapter 5	normal
7	7	7	7	0	7	8	8	8	8	0	8	7	7	7	6	3	7	Chapter 5	normal
7	7	7	7	0	7	8	8	8	7	6	5	7	7	7	3	7	7	Chapter 5	normal
7	5	7	4	0	7	7	6	7	6	5	7	8	7	7	6	2	6	Chapter 5	hard
7	7	0	7	7	7	8	7	6	6	7	7	7	6	0	7	7	7	Chapter 5	normal
7	7	7	7	7	7	7	7	7	7	7	7	7	7	7	1	7	7	Chapter 5	normal
7	7	7	7	7	7	8	8	7	7	7	7	8	7	6	6	7	6	Chapter 5	easy
7	7	7	7	7	7	7	6	6	6	7	7	8	6	6	6	8	7	Chapter 5	normal
7	7	7	7	7	7	6	6	6	6	5	7	7	7	6	6	3	7	Chapter 5	normal
7	7	8	5	3	7	7	7	7	6	7	8	7	7	7	6	7	7	Chapter 5	normal
7	7	7	0	6	8	7	7	7	0	7	7	7	5	7	2	8	8	Chapter 5	normal
7	7	7	5	7	7	8	8	8	7	7	7	7	7	7	2	7	8	Chapter 5	normal
7	7	7	6	7	0	7	7	8	6	7	8	3	7	3	7	3	0	Chapter 5	hard
7	7	7	7	7	7	7	7	7	7	7	8	7	7	7	7	7	7	Chapter 5	easy
7	7	7	6	4	0	8	8	7	7	7	7	8	7	7	6	6	2	Chapter 5	normal
7	7	4	0	4	7	7	7	6	5	7	7	8	8	0	0	5	8	Chapter 5	hard
4	6	6	4	0	7	7	7	7	7	0	6	6	8	8	8	0	7	Chapter 5	hard
7	7	7	3	0	7	7	7	7	7	4	7	8	7	8	8	0	8	Chapter 5	normal
7	7	6	7	3	3	5	7	5	7	5	5	8	8	2	8	2	8	Chapter 5	hard
0	0	0	0	0	0	7	7	6	6	7	7	2	2	2	6	8	6	Chapter 5	hard
7	7	7	7	7	5	7	7	7	7	7	7	8	8	8	8	8	8	Chapter 5	easy
7	7	7	7	6	7	6	6	6	6	8	7	8	8	8	0	0	8	Chapter 5	normal
7	2	2	2	1	7	8	6	6	5	6	6	7	7	7	1	7	8	Chapter 5	hard
7	7	7	5	5	8	8	6	8	5	4	7	8	6	8	7	2	8	Chapter 5	normal
7	7	5	7	0	7	6	7	7	7	2	7	7	6	7	8	0	7	Chapter 5	hard
6	6	6	6	6	6	7	7	7	7	0	7	7	7	6	6	0	6	Chapter 5	hard
7	7	6	7	5	5	8	8	7	7	6	7	7	7	7	7	7	7	Chapter 5	normal
5	5	5	5	5	5	7	6	7	7	6	7	8	8	8	8	8	8	Chapter 5	normal
5	5	5	5	5	5	8	6	6	0	0	9	8	7	6	6	2	7	Chapter 5	hard
7	5	3	5	5	5	8	7	7	7	7	7	7	3	7	3	5	7	Chapter 5	hard
5	3	5	7	7	5	8	7	7	7	7	7	7	5	7	4	5	6	Chapter 5	normal
7	7	7	7	7	7	7	7	7	7	7	6	7	3	6	2	7	2	Chapter 5	normal
7	7	7	7	7	7	8	8	8	8	7	7	8	8	8	8	8	8	Chapter 5	easy
7	7	6	6	6	6	8	7	7	6	6	6	7	5	7	7	7	7	Chapter 5	normal
5	4	5	5	5	5	6	5	6	7	7	7	6	6	6	5	8	6	Chapter 5	hard
5	5	5	5	5	5	6	7	7	7	7	5	8	4	6	6	6	7	Chapter 5	normal
7	7	7	7	7	7	8	8	8	4	5	7	8	8	8	5	8	8	Chapter 5	easy
7	5	5	4	4	6	8	7	8	7	7	6	8	7	8	8	8	6	Chapter 5	normal
5	5	5	5	7	7	8	8	8	7	8	7	8	8	9	0	7	3	Chapter 5	normal
7	7	7	7	7	7	8	7	7	6	7	7	7	7	8	3	3	8	Chapter 5	normal
7	0	7	6	5	5	7	7	7	7	6	7	8	8	8	4	8	8	Chapter 5	normal
7	7	7	0	7	7	7	7	8	7	6	6	8	8	8	4	0	7	Chapter 6	normal
7	6	7	5	5	5	7	8	8	8	7	7	7	7	7	5	6	6	Chapter 6	normal
7	7	7	0	0	7	6	6	6	6	0	7	7	7	4	6	2	6	Chapter 6	hard
10	7	7	7	7	7	8	8	7	7	7	7	7	7	7	7	1	8	Chapter 6	easy
7	1	0	7	7	4	8	8	8	8	8	8	7	2	2	6	7	3	Chapter 6	hard
7	7	7	7	7	7	7	7	8	7	7	7	7	7	7	7	7	7	Chapter 6	easy
7	7	7	7	7	7	7	7	7	7	7	7	8	6	7	5	6	6	Chapter 6	normal
7	7	0	7	7	5	7	7	6	6	6	7	7	7	6	7	6	3	Chapter 6	normal
7	0	7	4	7	7	7	7	7	5	7	7	7	3	7	7	5	5	Chapter 6	normal
7	7	7	0	7	7	6	6	6	6	7	7	7	7	7	4	7	7	Chapter 6	normal
7	7	7	7	7	7	8	6	6	0	5	7	8	4	7	1	8	7	Chapter 6	normal
7	7	7	7	7	7	8	7	7	0	7	6	7	7	7	5	5	7	Chapter 6	normal
7	7	7	7	7	7	8	7	8	7	7	7	7	7	7	7	7	7	Chapter 6	easy
7	3	7	3	7	7	8	5	8	5	7	7	8	4	8	6	8	8	Chapter 6	normal
7	7	7	7	7	7	7	4	5	4	5	6	8	1	5	2	5	4	Chapter 6	hard
3	3	3	3	5	7	7	7	7	7	7	7	7	3	7	6	8	4	Chapter 6	hard
7	5	5	5	5	7	8	6	7	7	4	6	8	7	6	0	6	6	Chapter 6	hard
8	1	8	1	8	8	7	0	7	6	6	6	8	6	7	7	7	7	Chapter 6	normal
8	8	8	0	0	0	7	7	7	4	4	7	8	8	8	5	0	7	Chapter 6	hard
8	8	8	0	0	0	7	6	6	6	0	7	8	8	8	4	0	6	Chapter 6	hard
8	0	7	7	6	8	7	0	7	0	7	7	8	1	8	0	4	7	Chapter 6	hard
7	7	7	0	7	7	7	7	7	0	7	7	8	8	8	3	3	7	Chapter 6	normal
7	7	7	7	0	7	7	7	7	7	6	7	7	7	7	7	2	6	Chapter 6	normal
7	3	7	5	8	7	8	7	7	7	6	7	8	6	8	6	2	8	Chapter 6	normal
7	7	7	6	7	7	7	7	7	7	7	7	7	7	7	7	4	5	Chapter 6	normal
10	0	5	5	5	8	7	7	7	7	7	7	6	6	6	6	8	7	Chapter 6	normal
9	5	5	6	6	7	7	7	7	7	7	7	7	6	6	7	2	7	Chapter 6	normal
7	6	8	0	8	6	7	7	7	0	5	7	7	6	7	6	6	7	Chapter 6	normal
8	3	8	6	0	6	7	7	7	0	0	7	8	7	8	6	0	7	Chapter 6	hard
7	0	7	2	5	4	7	0	0	7	7	7	7	6	7	6	7	8	Chapter 6	hard
7	7	7	7	8	7	7	6	7	5	7	7	8	8	8	7	8	7	Chapter 6	easy
5	5	5	6	4	5	5	5	5	5	5	5	7	7	7	6	7	8	Chapter 6	hard
1	5	0	8	3	8	4	5	5	6	7	6	3	2	0	8	6	8	Chapter 6	hard
8	8	8	8	8	8	7	7	7	7	7	7	7	2	7	7	7	7	Chapter 6	easy
8	8	8	7	9	7	7	6	7	7	7	7	8	8	8	6	8	7	Chapter 6	easy
7	7	7	8	8	7	7	7	7	6	7	6	8	7	8	8	8	8	Chapter 6	easy
8	8	8	8	8	5	7	7	7	7	7	7	8	7	7	1	6	0	Chapter 6	normal
7	7	7	0	7	6	6	7	7	6	5	6	4	3	5	4	6	7	Chapter 6	hard
0	0	0	7	0	0	7	7	7	7	7	7	2	2	2	6	2	2	Chapter 6	hard
8	8	8	8	8	8	7	7	7	7	7	7	8	2	8	5	8	2	Chapter 6	normal
0	8	0	0	0	0	7	7	7	7	0	7	2	7	2	2	1	1	Chapter 6	hard
8	0	8	0	3	5	6	6	6	6	6	6	7	6	8	7	6	7	Chapter 6	hard
5	0	0	5	0	0	7	7	7	7	6	7	4	2	2	0	6	4	Chapter 6	hard
8	0	5	5	5	5	7	7	7	7	7	7	7	7	7	7	7	7	Chapter 6	normal
0	4	8	4	4	4	0	0	0	0	0	0	2	6	7	4	4	3	Chapter 6	hard
8	5	5	5	0	5	7	0	7	6	6	8	8	6	5	7	8	5	Chapter 6	hard
8	0	0	5	0	5	7	6	6	6	0	6	6	8	7	7	0	7	Chapter 6	hard
9	9	9	9	7	9	7	7	7	7	6	7	8	8	8	8	7	8	Chapter 6	easy
8	8	3	3	8	7	8	8	8	8	8	8	8	8	5	5	8	8	Chapter 6	easy
0	7	0	0	0	5	8	8	8	6	7	7	8	8	7	8	6	6	Chapter 6	hard
9	8	5	5	0	8	8	7	6	6	6	6	8	7	8	8	7	7	Chapter 6	normal
8	8	8	8	0	8	8	7	7	6	0	7	8	7	5	6	6	6	Chapter 6	normal
8	8	8	8	8	8	7	6	6	6	6	6	8	7	8	7	2	2	Chapter 6	normal
3	7	0	0	7	8	6	6	6	6	6	6	6	7	0	0	7	7	Chapter 6	hard
8	0	0	0	3	7	8	7	7	7	6	7	7	6	7	6	7	6	Chapter 6	hard
0	7	8	0	0	7	7	6	7	7	0	7	8	7	8	4	0	8	Chapter 6	hard
8	8	8	8	8	8	7	7	7	6	7	7	5	1	1	8	1	1	Chapter 6	normal
9	9	9	9	9	9	7	7	7	7	7	7	8	8	8	8	8	8	Chapter 6	easy
8	8	8	8	0	0	7	7	6	7	7	6	8	8	2	8	1	1	Chapter 6	hard
8	8	8	0	5	8	7	6	7	6	6	7	7	8	8	8	8	8	Chapter 6	normal
7	7	7	0	7	7	7	6	7	6	6	7	7	7	7	5	5	7	Chapter 6	normal
8	8	8	8	8	7	7	6	6	6	6	7	8	4	8	6	5	6	Chapter 6	normal
8	7	4	0	7	7	7	7	7	0	6	7	8	5	6	6	7	8	Chapter 6	normal
7	6	8	7	7	6	7	7	7	0	5	7	6	7	7	2	0	6	Chapter 6	hard
8	6	7	0	7	8	6	6	7	7	6	6	8	4	7	4	1	6	Chapter 6	hard
9	9	9	7	5	6	6	6	6	6	6	7	8	5	8	5	6	6	Chapter 6	normal
9	0	0	1	9	9	7	6	6	6	7	7	7	2	2	8	9	10	Chapter 6	hard
8	8	8	8	8	8	7	6	7	6	6	7	7	7	8	8	8	8	Chapter 6	easy
5	5	8	5	5	5	6	7	6	7	7	7	8	8	8	7	7	8	Chapter 6	normal
7	7	7	7	8	6	7	6	7	6	7	6	8	8	8	8	8	6	Chapter 6	easy
8	8	8	8	0	0	7	7	7	7	0	7	7	7	7	7	0	6	Chapter 6	hard
7	0	8	8	7	8	6	6	7	7	7	7	8	1	8	7	7	7	Chapter 6	normal
8	8	8	8	8	8	7	7	7	7	7	7	8	6	6	6	6	6	Chapter 6	easy
8	8	8	8	6	5	7	6	7	6	6	6	8	6	8	8	6	8	Chapter 6	normal
7	7	7	0	0	7	7	5	5	0	0	7	8	6	7	0	0	7	Chapter 6	hard
7	0	7	3	3	3	6	0	8	0	7	7	2	0	9	0	8	2	Chapter 6	hard
3	5	5	3	7	6	6	6	6	6	6	6	7	5	8	8	8	8	Chapter 6	normal
9	7	7	5	4	6	7	6	7	7	0	7	7	8	7	6	6	6	Chapter 6	normal
8	8	8	8	6	8	7	6	7	7	7	7	6	2	5	5	5	5	Chapter 6	normal
4	3	3	0	2	2	7	7	7	7	0	4	1	0	0	2	0	5	Chapter 6	hard
7	7	7	5	7	7	6	7	4	4	0	6	6	8	2	6	5	7	Chapter 6	hard
0	7	7	0	5	2	4	4	4	4	4	4	5	5	7	0	6	5	Chapter 6	hard
5	5	5	5	6	6	6	7	6	7	6	6	5	4	4	4	4	4	Chapter 3	hard
5	5	5	4	3	3	7	7	6	6	6	6	8	2	6	6	4	4	Chapter 3	hard
0	0	0	0	0	3	0	0	7	0	0	7	0	0	0	8	0	7	Chapter 3	hard
5	5	5	2	5	4	7	7	7	7	7	7	7	6	7	7	7	7	Chapter 3	normal
7	0	7	0	7	5	7	0	7	7	6	6	8	0	2	8	0	2	Chapter 3	hard
5	5	5	5	4	3	6	0	5	5	0	6	7	0	6	6	1	7	Chapter 3	hard
5	5	4	7	6	6	7	7	7	7	7	7	7	7	0	6	7	7	Chapter 3	normal
7	0	7	0	6	7	7	0	6	6	7	6	7	0	8	5	6	7	Chapter 3	hard
6	9	5	6	3	3	6	6	6	6	6	6	8	8	7	8	7	2	Chapter 4	normal
10	10	0	0	0	0	7	6	0	5	0	0	8	8	0	8	0	0	Chapter 4	hard
8	8	8	5	5	3	7	7	6	6	6	6	8	8	8	4	4	8	Chapter 4	normal
8	5	5	5	8	5	7	7	7	7	7	7	8	6	7	4	8	6	Chapter 4	normal
5	5	7	5	5	5	6	6	7	5	6	6	7	7	7	7	7	8	Chapter 4	normal
8	8	5	6	5	7	7	6	6	6	6	6	7	8	7	6	8	8	Chapter 4	normal
7	7	7	7	7	7	7	7	7	7	7	7	5	8	2	2	7	2	Chapter 4	normal
7	7	7	0	0	8	7	6	6	6	6	6	7	5	7	5	9	5	Chapter 4	hard
9	9	9	9	8	8	7	4	6	6	6	6	8	8	8	8	8	8	Chapter 4	easy
8	8	5	8	8	5	6	0	7	6	6	6	8	8	8	8	8	8	Chapter 4	normal
8	7	5	4	7	7	7	7	7	7	7	7	8	8	8	6	6	5	Chapter 4	normal
8	8	8	5	9	8	7	7	7	7	7	7	6	7	6	6	7	7	Chapter 4	easy
8	8	8	3	8	8	7	7	7	4	7	7	8	8	8	2	8	8	Chapter 4	normal
8	8	8	8	8	8	6	5	7	6	7	7	8	8	8	8	8	8	Chapter 4	easy
7	7	8	8	8	8	7	7	6	7	7	7	8	8	8	8	9	8	Chapter 4	easy
8	8	8	8	0	0	7	7	7	7	7	7	8	8	8	8	2	0	Chapter 4	normal
8	8	8	3	8	8	7	6	7	7	6	6	6	6	7	7	4	7	Chapter 4	normal
3	3	8	8	8	3	7	7	7	7	7	7	0	0	9	4	4	4	Chapter 4	hard
7	7	7	7	7	7	6	6	6	6	6	6	6	6	6	6	6	4	Chapter 5	normal
8	8	8	6	7	7	5	6	6	6	7	6	8	8	8	7	7	5	Chapter 5	normal
4	5	5	4	5	5	7	6	7	7	7	7	2	2	2	2	2	2	Chapter 5	hard
7	7	7	5	7	7	7	7	7	6	7	7	5	5	8	4	5	5	Chapter 5	normal
8	8	7	3	3	5	7	6	7	6	7	6	7	7	7	2	8	8	Chapter 5	normal
8	8	8	8	5	7	7	7	7	2	7	7	8	8	8	8	8	8	Chapter 5	easy
7	7	2	2	2	2	7	7	7	7	7	7	8	8	7	8	7	8	Chapter 5	normal
0	0	5	5	0	0	7	7	7	6	7	7	7	7	9	8	7	7	Chapter 5	hard
8	8	8	8	9	8	7	7	7	6	7	7	8	8	8	8	8	8	Chapter 5	easy
8	8	8	8	8	8	7	7	7	7	7	7	8	8	8	8	8	8	Chapter 5	easy
8	8	8	8	8	9	7	6	7	7	7	7	8	3	8	8	8	8	Chapter 5	easy
5	6	4	2	4	0	7	7	7	7	7	7	8	3	8	8	8	6	Chapter 5	hard
8	7	8	8	8	8	7	7	7	7	7	7	7	5	3	6	7	7	Chapter 5	normal
7	0	7	8	7	0	7	7	7	7	7	7	8	0	8	7	7	5	Chapter 5	normal
8	8	8	8	2	8	7	7	7	7	6	7	8	8	2	5	2	8	Chapter 5	normal
8	3	7	7	7	7	7	6	7	6	7	6	7	6	7	2	5	5	Chapter 5	normal
8	8	8	8	8	8	8	8	8	6	8	8	8	8	8	5	8	8	Chapter 5	easy
5	5	8	7	6	8	7	7	7	7	7	7	5	8	8	8	7	8	Chapter 5	normal
6	6	7	7	7	5	7	7	7	7	7	7	7	7	7	7	7	7	Chapter 5	normal
7	7	7	7	7	7	7	7	7	7	7	7	8	8	8	0	8	8	Chapter 5	normal
7	7	7	7	0	7	7	7	7	7	5	7	7	7	7	5	2	7	Chapter 5	normal
5	5	4	5	5	8	7	6	6	5	0	7	8	6	8	6	1	8	Chapter 5	hard
8	5	7	6	6	6	7	3	7	7	6	7	8	3	6	6	5	8	Chapter 5	normal
7	7	7	5	5	8	5	4	5	3	8	0	7	5	8	1	7	7	Chapter 5	hard
7	7	7	5	7	6	6	2	6	3	4	5	8	5	8	6	6	6	Chapter 5	hard
8	5	5	6	7	7	6	6	7	5	5	7	8	8	8	1	8	8	Chapter 5	normal
6	6	6	0	7	7	7	6	7	5	7	5	8	8	8	0	8	6	Chapter 5	normal
5	5	5	5	0	5	0	0	6	2	0	6	8	8	6	7	0	8	Chapter 5	hard
7	7	7	7	7	7	6	7	6	6	6	6	8	8	7	7	3	3	Chapter 6	normal
8	8	7	7	7	7	6	6	6	6	7	6	8	8	8	8	8	8	Chapter 6	easy
7	7	7	7	7	7	5	3	7	7	7	7	8	0	8	1	1	7	Chapter 6	hard
7	7	7	7	7	7	7	7	7	7	7	6	8	8	7	0	8	8	Chapter 6	normal
7	7	5	5	5	5	7	5	7	6	7	7	8	3	1	6	6	6	Chapter 6	hard
7	7	7	7	0	7	7	7	7	7	0	7	8	7	8	8	0	7	Chapter 6	normal
7	7	7	7	7	7	7	7	6	6	5	8	8	8	8	8	6	6	Chapter 6	normal
7	7	7	7	7	7	8	8	8	8	8	8	8	8	8	8	8	8	Chapter 6	easy
7	7	7	7	7	7	7	6	6	5	0	7	8	8	8	0	0	8	Chapter 6	hard
8	8	8	8	0	8	7	4	6	4	5	6	8	8	8	8	6	3	Chapter 6	normal
8	8	8	0	5	8	6	6	7	0	0	7	8	8	8	0	6	7	Chapter 6	hard
7	7	7	6	7	7	6	6	7	6	7	7	7	7	7	7	7	7	Chapter 6	normal
7	7	7	7	7	7	7	0	6	6	7	5	8	0	8	8	8	8	Chapter 6	normal
7	0	5	5	7	7	7	0	6	4	7	7	8	0	8	7	7	7	Chapter 6	hard
7	5	3	3	3	5	7	7	0	7	7	7	8	4	7	0	0	0	Chapter 6	hard
7	7	5	7	5	7	7	7	6	6	6	6	7	6	7	8	8	8	Chapter 6	normal
5	5	5	5	6	6	7	7	7	6	6	6	7	8	8	8	7	6	Chapter 6	normal
8	8	8	5	8	8	7	6	6	5	5	6	8	7	8	7	8	8	Chapter 6	easy
8	5	7	7	7	7	7	6	7	5	5	6	8	5	7	7	8	7	Chapter 6	normal
5	5	5	3	7	5	5	5	5	5	6	6	7	6	8	7	7	8	Chapter 6	hard
7	7	7	7	7	7	5	5	0	7	6	7	8	8	8	8	8	8	Chapter 6	normal
8	8	8	8	8	8	7	5	7	7	7	7	8	8	8	8	8	8	Chapter 6	easy
7	7	7	7	7	7	6	7	7	6	0	7	8	8	8	7	0	8	Chapter 6	normal
7	7	7	7	0	7	6	7	0	5	0	8	7	3	7	7	0	7	Chapter 6	hard
7	7	7	7	7	7	7	0	7	3	0	0	8	2	8	1	7	6	Chapter 6	hard
7	3	6	7	7	7	7	6	6	7	6	6	6	6	8	7	5	7	Chapter 6	normal
7	7	7	7	7	7	7	6	7	7	7	7	8	8	8	8	8	8	Chapter 6	easy
7	7	7	7	0	7	8	7	7	7	7	7	8	7	8	7	1	7	Chapter 6	normal
7	5	7	5	7	7	7	7	8	7	7	6	8	8	8	8	4	8	Chapter 6	normal
7	7	7	7	7	7	7	7	7	7	7	6	8	8	8	8	8	8	Chapter 6	easy
7	7	7	7	7	7	7	7	7	7	6	6	8	8	8	8	8	8	Chapter 6	easy
7	7	7	7	7	7	8	7	7	7	7	7	8	5	8	6	8	8	Chapter 6	easy
7	7	7	7	7	7	7	7	7	7	7	7	6	7	8	7	8	8	Chapter 6	easy

## Sheet: Close-VQA
GPT-4	Bard	Claude-2.0	LLaMa-2	ERNIE-Bot-4.0	Qwen-Max	Random	Chapter
1	0	1	1	1	1	easy	Chapter 2
1	1	1	0	0	0	normal	Chapter 2
1	1	1	0	0	0	normal	Chapter 2
1	1	1	0	1	1	easy	Chapter 2
1	0	0	0	0	1	hard	Chapter 2
0	0	1	0	0	1	hard	Chapter 2
0	1	0	0	0	0	hard	Chapter 2
1	1	1	0	0	0	normal	Chapter 2
0	0	1	0	0	0	hard	Chapter 2
1	1	0	0	0	1	normal	Chapter 2
0	0	1	0	1	0	normal	Chapter 2
0	1	1	0	0	1	normal	Chapter 2
1	1	1	1	1	1	easy	Chapter 2
0	1	1	0	0	1	normal	Chapter 2
0	0	0	0	0	1	hard	Chapter 2
0	0	1	0	1	0	normal	Chapter 2
0	1	1	1	0	1	normal	Chapter 2
0	0	0	0	0	1	hard	Chapter 2
1	1	0	1	1	0	easy	Chapter 2
1	1	1	0	0	1	normal	Chapter 2
1	1	0	0	0	1	normal	Chapter 2
0	1	0	0	0	1	hard	Chapter 2
0	1	1	0	0	0	normal	Chapter 2
0	0	1	0	0	0	hard	Chapter 2
0	0	0	0	0	1	hard	Chapter 2
0	1	0	1	1	0	normal	Chapter 2
1	1	1	0	0	1	normal	Chapter 2
1	1	0	0	1	1	normal	Chapter 2
0	0	1	0	1	1	normal	Chapter 2
1	0	0	1	1	0	normal	Chapter 2
1	0	1	0	0	1	normal	Chapter 2
1	1	1	0	0	1	normal	Chapter 2
0	0	0	1	1	0	normal	Chapter 2
1	1	1	0	0	0	normal	Chapter 2
0	0	1	0	0	1	hard	Chapter 2
0	0	0	0	1	1	hard	Chapter 2
0	1	1	0	0	1	normal	Chapter 2
1	0	1	0	0	1	normal	Chapter 2
1	0	0	0	1	0	normal	Chapter 2
1	1	1	0	0	1	normal	Chapter 2
0	0	1	0	0	1	hard	Chapter 2
1	0	0	0	1	0	normal	Chapter 2
1	1	1	0	0	0	normal	Chapter 2
0	0	0	0	0	0	hard	Chapter 2
0	0	0	0	1	1	hard	Chapter 2
1	1	0	1	1	1	easy	Chapter 2
1	0	1	0	0	1	normal	Chapter 2
1	1	1	0	0	1	normal	Chapter 2
1	0	0	1	1	1	normal	Chapter 2
1	0	0	1	1	0	normal	Chapter 2
1	1	1	0	0	0	normal	Chapter 2
1	1	1	0	0	1	normal	Chapter 2
0	0	1	0	1	1	normal	Chapter 2
0	0	0	1	1	0	normal	Chapter 2
1	1	0	0	0	1	normal	Chapter 2
1	0	0	1	1	0	normal	Chapter 2
1	0	0	1	1	0	normal	Chapter 2
0	0	0	0	0	0	hard	Chapter 2
1	0	0	0	0	0	hard	Chapter 2
0	1	0	0	1	1	normal	Chapter 2
0	0	0	0	1	1	hard	Chapter 2
0	1	0	0	0	0	hard	Chapter 2
1	1	1	0	0	0	normal	Chapter 2
1	0	0	1	1	0	normal	Chapter 2
1	1	0	1	0	0	normal	Chapter 2
1	1	1	0	0	1	normal	Chapter 2
1	0	0	0	0	1	hard	Chapter 2
1	1	1	0	1	1	easy	Chapter 2
0	1	1	0	0	0	normal	Chapter 2
0	1	1	0	0	1	normal	Chapter 2
1	1	1	0	0	1	normal	Chapter 2
0	1	1	0	0	0	normal	Chapter 2
0	0	1	0	0	0	hard	Chapter 2
1	1	1	1	0	0	easy	Chapter 2
0	1	1	0	0	0	normal	Chapter 2
1	1	0	0	0	1	normal	Chapter 2
0	0	1	0	0	0	hard	Chapter 2
1	0	1	0	0	1	normal	Chapter 2
0	0	0	0	1	0	hard	Chapter 2
1	1	1	0	1	0	easy	Chapter 2
0	0	0	0	1	0	hard	Chapter 2
0	0	1	0	1	1	normal	Chapter 2
1	0	0	0	0	0	hard	Chapter 2
1	1	1	0	0	1	normal	Chapter 2
1	1	1	0	0	0	normal	Chapter 2
0	1	1	0	0	1	normal	Chapter 2
1	1	1	0	0	0	normal	Chapter 2
1	0	0	1	0	1	normal	Chapter 2
1	1	1	0	0	0	normal	Chapter 2
0	0	0	0	0	0	hard	Chapter 2
0	1	0	0	1	1	normal	Chapter 2
0	0	1	0	0	0	hard	Chapter 2
0	1	0	0	1	0	normal	Chapter 4
0	0	1	0	1	0	normal	Chapter 4
1	1	1	1	1	0	easy	Chapter 4
0	0	1	0	0	0	hard	Chapter 4
0	0	0	0	0	1	hard	Chapter 4
1	1	1	0	0	1	normal	Chapter 4
1	1	1	0	1	0	easy	Chapter 4
1	0	1	0	1	1	normal	Chapter 4
0	1	1	0	0	1	normal	Chapter 4
1	0	0	0	0	0	hard	Chapter 4
1	1	0	0	0	1	normal	Chapter 4
1	1	0	1	1	1	easy	Chapter 4
0	1	0	0	0	0	hard	Chapter 4
1	1	1	0	0	0	normal	Chapter 4
0	0	1	0	0	0	hard	Chapter 4
1	1	1	0	0	0	normal	Chapter 4
1	0	0	0	0	1	hard	Chapter 4
0	0	0	0	1	1	hard	Chapter 4
1	1	1	0	0	0	normal	Chapter 4
1	1	1	0	0	0	normal	Chapter 4
0	0	1	0	0	1	hard	Chapter 4
1	0	0	0	0	0	hard	Chapter 4
1	1	0	1	0	0	normal	Chapter 4
0	1	1	0	1	0	normal	Chapter 4
1	1	1	0	1	0	easy	Chapter 4
0	1	1	0	1	0	normal	Chapter 4
1	1	1	0	0	1	normal	Chapter 4
1	1	1	1	0	0	easy	Chapter 4
1	1	1	0	0	0	normal	Chapter 4
1	1	0	0	0	1	normal	Chapter 4
1	1	0	0	1	1	normal	Chapter 4
0	1	0	0	0	0	hard	Chapter 4
0	0	1	0	0	1	hard	Chapter 4
1	0	1	1	1	0	easy	Chapter 4
1	1	0	1	1	1	easy	Chapter 4
1	1	1	0	1	0	easy	Chapter 4
1	1	0	1	1	0	easy	Chapter 4
0	1	1	0	1	1	normal	Chapter 4
0	0	0	0	0	0	hard	Chapter 4
1	1	1	0	0	0	normal	Chapter 4
1	1	1	1	1	1	easy	Chapter 4
0	0	1	0	0	0	hard	Chapter 4
1	1	0	0	0	1	normal	Chapter 4
1	1	1	0	1	1	easy	Chapter 4
0	0	0	0	0	0	hard	Chapter 4
1	0	0	1	1	1	normal	Chapter 4
1	1	0	0	0	1	normal	Chapter 4
0	0	1	0	1	1	normal	Chapter 4
0	0	1	0	0	0	hard	Chapter 4
0	0	0	0	0	0	hard	Chapter 4
0	1	1	0	1	1	normal	Chapter 4
1	1	1	0	1	1	easy	Chapter 4
1	0	1	1	0	0	normal	Chapter 4
1	1	1	0	0	1	normal	Chapter 4
1	1	0	1	0	0	normal	Chapter 4
0	1	0	1	1	0	normal	Chapter 4
0	0	0	1	1	0	normal	Chapter 4
1	1	0	1	1	0	easy	Chapter 4
1	1	0	1	1	1	easy	Chapter 4
1	1	1	1	1	0	easy	Chapter 4
0	0	0	0	0	0	hard	Chapter 4
1	1	0	1	0	0	normal	Chapter 4
1	1	0	1	1	0	easy	Chapter 4
1	1	0	1	0	0	normal	Chapter 4
1	0	0	0	1	1	normal	Chapter 4
1	0	0	1	1	0	normal	Chapter 5
1	1	0	1	1	1	easy	Chapter 5
0	0	0	1	1	1	normal	Chapter 5
0	0	1	0	0	1	hard	Chapter 5
1	1	1	1	1	0	easy	Chapter 5
0	0	1	1	1	1	normal	Chapter 5
1	1	0	0	0	0	normal	Chapter 5
1	1	0	1	1	1	easy	Chapter 5
1	1	0	1	1	1	easy	Chapter 5
1	1	0	1	0	0	normal	Chapter 5
0	0	0	0	1	0	hard	Chapter 5
1	1	0	1	1	1	easy	Chapter 5
1	1	1	1	1	0	easy	Chapter 5
1	1	0	1	1	1	easy	Chapter 5
0	0	0	1	1	0	normal	Chapter 5
1	0	0	1	1	0	normal	Chapter 5
1	1	1	1	1	1	easy	Chapter 5
0	0	1	0	0	0	hard	Chapter 5
1	1	1	1	1	0	easy	Chapter 5
1	1	0	1	1	1	easy	Chapter 5
1	1	0	1	1	1	easy	Chapter 5
1	1	1	1	1	1	easy	Chapter 5
1	1	1	1	1	1	easy	Chapter 5
1	1	0	1	1	1	easy	Chapter 5
1	0	0	1	1	1	normal	Chapter 5
1	1	0	1	0	1	normal	Chapter 5
0	0	0	1	1	0	normal	Chapter 5
1	1	0	1	1	0	easy	Chapter 5
1	1	0	1	0	0	normal	Chapter 5
1	0	0	1	0	0	normal	Chapter 5
1	0	0	1	0	0	normal	Chapter 5
1	1	0	1	1	1	easy	Chapter 5
1	1	0	1	0	1	normal	Chapter 5
1	0	0	1	0	0	normal	Chapter 5
0	0	0	1	1	0	normal	Chapter 5
1	1	1	1	0	0	easy	Chapter 5
1	1	0	1	0	0	normal	Chapter 5
0	1	0	1	0	1	normal	Chapter 5
1	1	0	1	0	1	normal	Chapter 5
1	1	1	1	0	0	easy	Chapter 5
1	0	0	1	1	0	normal	Chapter 5
1	1	0	1	1	1	easy	Chapter 5
1	1	0	1	1	1	easy	Chapter 5
1	1	0	1	0	0	normal	Chapter 5
1	1	0	1	0	0	normal	Chapter 5
1	1	1	1	0	0	easy	Chapter 5
1	0	0	1	1	0	normal	Chapter 5
0	0	1	1	0	0	normal	Chapter 5
1	1	1	1	0	0	easy	Chapter 5
1	1	0	1	1	0	easy	Chapter 5
0	0	0	1	0	1	hard	Chapter 5
0	0	0	0	1	0	hard	Chapter 5
1	0	1	1	0	1	normal	Chapter 5
1	1	0	1	1	0	easy	Chapter 5
0	1	0	1	1	0	normal	Chapter 5
0	1	0	1	1	1	normal	Chapter 5
1	1	0	0	1	1	normal	Chapter 5
1	1	0	0	0	1	normal	Chapter 5
0	1	1	1	1	0	easy	Chapter 5
1	1	0	1	1	0	easy	Chapter 5
1	1	0	1	1	0	easy	Chapter 5
1	0	0	1	1	0	normal	Chapter 5
1	1	1	1	1	1	easy	Chapter 5
1	0	0	0	1	0	normal	Chapter 5
1	1	0	0	1	0	normal	Chapter 5
1	1	1	1	0	1	easy	Chapter 5
0	1	0	1	1	0	normal	Chapter 5
0	0	0	1	1	1	normal	Chapter 5
1	1	1	1	0	0	easy	Chapter 5
0	0	0	1	1	0	normal	Chapter 5
1	1	1	1	0	0	easy	Chapter 5
1	1	0	1	0	1	normal	Chapter 5
1	0	0	0	0	0	hard	Chapter 5
1	1	0	1	1	0	easy	Chapter 5
1	0	0	1	1	1	normal	Chapter 5
0	0	0	1	1	0	normal	Chapter 5
0	0	0	0	1	1	hard	Chapter 5
1	1	0	1	1	0	easy	Chapter 6
1	1	0	1	0	0	normal	Chapter 6
1	1	1	1	1	0	easy	Chapter 6
0	0	0	1	1	1	normal	Chapter 6
0	0	0	1	1	1	normal	Chapter 6
1	1	0	1	1	1	easy	Chapter 6
1	0	0	0	1	0	normal	Chapter 6
1	1	1	1	1	1	easy	Chapter 6
1	0	1	1	1	0	easy	Chapter 6
1	1	1	1	1	1	easy	Chapter 6
1	1	0	1	1	0	easy	Chapter 6
1	0	0	1	0	0	normal	Chapter 6
0	1	0	1	1	1	normal	Chapter 6
0	1	0	1	1	1	normal	Chapter 6
0	0	0	1	1	1	normal	Chapter 6
1	1	1	1	1	1	easy	Chapter 6
1	0	1	1	1	0	easy	Chapter 6
1	0	1	1	1	0	easy	Chapter 6
1	1	0	1	0	0	normal	Chapter 6
1	1	0	1	1	1	easy	Chapter 6
1	0	1	1	1	1	easy	Chapter 6
1	1	0	1	0	1	normal	Chapter 6
1	0	1	1	1	1	easy	Chapter 6
1	1	0	1	0	1	normal	Chapter 6
1	1	0	1	1	0	easy	Chapter 6
1	1	0	1	1	0	easy	Chapter 6
1	1	0	1	1	0	easy	Chapter 6
1	0	0	1	1	0	normal	Chapter 6
1	0	1	1	1	1	easy	Chapter 6
1	0	1	1	1	1	easy	Chapter 6
1	1	0	1	1	1	easy	Chapter 6
1	0	1	1	1	1	easy	Chapter 6
1	1	0	1	0	1	normal	Chapter 6
0	0	0	1	1	0	normal	Chapter 6
1	0	0	1	0	1	normal	Chapter 6
1	1	0	1	0	0	normal	Chapter 6
1	0	0	1	1	0	normal	Chapter 6
1	1	1	1	1	0	easy	Chapter 6
1	0	0	1	0	1	normal	Chapter 6
1	0	0	1	1	1	normal	Chapter 6
1	0	0	1	0	0	normal	Chapter 6
1	1	0	1	1	0	easy	Chapter 6
1	0	1	1	1	0	easy	Chapter 6
1	1	1	1	1	1	easy	Chapter 6
1	0	0	1	0	1	normal	Chapter 6
1	0	0	1	0	0	normal	Chapter 7
1	1	0	1	0	0	normal	Chapter 7
1	1	1	1	1	0	easy	Chapter 7
1	0	0	1	1	0	normal	Chapter 7
1	1	0	1	1	0	easy	Chapter 7
1	0	0	1	1	0	normal	Chapter 7
0	0	0	1	0	1	hard	Chapter 7
1	1	0	1	1	0	easy	Chapter 7
0	0	0	1	1	0	normal	Chapter 7
1	0	0	1	1	0	normal	Chapter 7
1	0	1	0	1	1	normal	Chapter 7
0	0	1	0	0	0	hard	Chapter 7
1	1	1	1	0	1	easy	Chapter 7
1	1	0	1	1	0	easy	Chapter 7
1	1	1	1	1	0	easy	Chapter 7
1	1	0	1	1	1	easy	Chapter 7
1	1	0	1	1	0	easy	Chapter 7
1	0	0	1	0	0	normal	Chapter 7
1	1	0	1	1	0	easy	Chapter 7
1	0	0	1	1	1	normal	Chapter 7
1	1	0	1	0	1	normal	Chapter 7
0	0	0	1	1	1	normal	Chapter 7
1	1	0	1	1	1	easy	Chapter 7
1	1	1	1	1	0	easy	Chapter 7
0	0	0	1	1	1	normal	Chapter 7
0	0	0	0	1	1	hard	Chapter 7
0	0	0	1	1	1	normal	Chapter 7
1	0	0	1	0	0	normal	Chapter 7

## Sheet: Open-VQA (G-Eval)
Excel_line	Gemini	GPT-4V	LLaVa	Qwen-VL	Chapter	Difficulty
1	0.6	0.7	0.7	0.7	Chapter 2	easy
2	0.8	0.5	0	0.6	Chapter 2	normal
3	0.9	0.2	0.15	0.3	Chapter 2	normal
4	0.7	0.6	0.1	0.2	Chapter 2	normal
5	0.3	0.2	0.2	0.3	Chapter 2	normal
6	0.2	0.2	0	0.8	Chapter 2	hard
7	0.3	0.2	0.25	0	Chapter 2	normal
8	0	0.25	0.15	0	Chapter 2	hard
9	0.2	0.2	0.1	0.4	Chapter 2	easy
10	0.1	0.25	0.1	0	Chapter 2	hard
11	0.2	0.1	0.1	0	Chapter 2	hard
12	1	0.25	0.15	0.1	Chapter 2	normal
13	0	0	0.5	0	Chapter 2	hard
14	0.2	0.3	0.2	0	Chapter 2	normal
15	0.3	0.4	0	0	Chapter 2	normal
16	0.2	0.2	0.15	0.3	Chapter 2	normal
17	0.9	0.5	0.3	0.5	Chapter 2	normal
18	0.4	0	0.3	0.5	Chapter 2	normal
19	0.4	0.8	0.15	0.6	Chapter 2	normal
20	0.2	0	0.25	0.5	Chapter 2	normal
21	0.7	0.6	0.2	0.825	Chapter 2	normal
22	0.15	0.2	0.2	0.25	Chapter 2	easy
23	0.1	0.25	0.1	0.25	Chapter 2	hard
24	0	0.25	0.1	0.1	Chapter 2	normal
25	0.2	0.1	0	0.2	Chapter 2	hard
26	0.2	0.25	0.25	0.15	Chapter 2	normal
27	0.1	0	0.25	0.25	Chapter 2	hard
28	0	0.1	0.25	0	Chapter 2	hard
29	0.1	0.25	0	0.2	Chapter 2	hard
30	0.7	0.3	0	0.1	Chapter 2	normal
31	0	0	0	0	Chapter 2	hard
32	0	0.1	0.1	0.2	Chapter 2	hard
33	0.1	0.1	0	0	Chapter 2	hard
34	0.9	0.6	0.25	0.2	Chapter 2	hard
35	0.1	0.2	0.2	0.2	Chapter 2	normal
36	0	0.1	0	0.1	Chapter 2	hard
37	0.1	0.1	0.2	0	Chapter 2	hard
38	0	0.2	0	0	Chapter 2	hard
39	0	0.1	0.1	0	Chapter 2	hard
40	0	0.2	0.1	0.2	Chapter 2	normal
41	0.2	0.2	0.2	0.4	Chapter 2	easy
42	0.6	0.7	0.1	0.2	Chapter 4	easy
43	0.8	0.3	0.3	0.2	Chapter 4	normal
44	0.6	0.2	0.1	0.2	Chapter 4	easy
45	0	0	0.2	0	Chapter 4	normal
46	0	0	0	0	Chapter 4	hard
47	0.4	0.4	0.1	0.1	Chapter 4	normal
48	0.2	0.2	0.1	0	Chapter 4	normal
49	0.2	0.3	0.25	0	Chapter 4	hard
50	0.1	0.2	0.2	0.75	Chapter 4	normal
51	0	0	0.3	0	Chapter 4	normal
52	0.1	0.2	0.25	0.2	Chapter 4	hard
53	0	0.2	0.2	0	Chapter 4	hard
54	0.6	0.2	0.15	0	Chapter 4	easy
55	0.3	0.3	0.25	0.2	Chapter 4	easy
56	0.3	0.5	0.3	0.2	Chapter 4	easy
57	0.25	0.2	0.1	0	Chapter 4	hard
58	0.3	0.2	0.2	0	Chapter 4	easy
59	0	0	0	0	Chapter 4	hard
60	0.1	0.5	0.2	0.25	Chapter 4	easy
61	0.35	0.3	0.3	0.2	Chapter 4	easy
62	0.2	0.25	0.2	0.1	Chapter 4	normal
63	0	0.1	0.1	0.2	Chapter 4	normal
64	0.25	0.2	0.1	0.1	Chapter 5	hard
65	0.2	0.2	0.2	0.2	Chapter 5	easy
66	0.2	0.4	0.3	0.15	Chapter 5	normal
67	0.2	0.1	0.2	0.1	Chapter 5	easy
68	0.2	0.4	0.2	0.25	Chapter 5	normal
69	0.3	0.4	0.2	0.1	Chapter 5	normal
70	0.7	0.7	0.1	0.2	Chapter 5	easy
71	0.2	0.3	0	0.7	Chapter 5	normal
72	0.2	0.6	0.2	0	Chapter 5	normal
73	0.1	0.1	0.2	0.4	Chapter 5	easy
74	0.7	0.4	0.3	0.3	Chapter 5	easy
75	0.5	0.6	0.25	0.5	Chapter 5	easy
76	0.2	0.4	0.2	0.1	Chapter 5	easy
77	0.2	0.2	0	0.3	Chapter 5	hard
78	0.25	0.2	0.1	0.2	Chapter 5	normal
79	0.1	0.2	0.2	0	Chapter 5	normal
80	0.8	0	0.3	0.4	Chapter 5	normal
81	0	0.65	0	0.2	Chapter 5	hard
82	0.1	0.25	0.2	0.2	Chapter 5	hard
83	0.2	0.3	0.2	0.2	Chapter 6	hard
84	0.6	0.25	0.2	0.85	Chapter 6	normal
85	0.4	0.6	0.2	0.5	Chapter 6	easy
86	0.2	0	0.1	0.4	Chapter 6	hard
87	0.4	0.3	0.2	0.5	Chapter 6	hard
88	0.25	0.3	0.25	0.2	Chapter 6	easy
89	0.1	0	0.1	0.7	Chapter 6	normal
90	0.3	0.3	0.3	0.4	Chapter 6	normal
91	0.8	0.35	0.1	0.1	Chapter 6	easy
92	0.1	0.2	0.25	0.255	Chapter 6	normal
93	0.925	0.3	0	0.4	Chapter 6	normal
94	0.2	0.3	0.2	0.15	Chapter 6	hard
95	0.3	0.5	0.2	0.4	Chapter 6	easy
96	0.2	0	0.2	0.25	Chapter 6	normal
97	0.4	0	0.1	0.4	Chapter 6	normal
98	0.5	0.4	0.2	0.4	Chapter 6	normal
99	0.4	0.4	0	0.2	Chapter 6	normal
100	0.2	0.2	0.1	0	Chapter 6	hard
101	0.2	0.2	0	0.3	Chapter 6	normal
102	0.4	0.3	0.2	0.1	Chapter 6	normal
103	0.2	0	0.1	0.2	Chapter 6	hard
104	0.2	0.4	0	0.2	Chapter 6	normal
105	0.2	0.7	0.3	0.2	Chapter 7	easy
106	0.2	0.2	0.2	0.425	Chapter 7	normal
107	0.1	0	0	0.2	Chapter 7	easy
108	0	0.2	0.2	0	Chapter 7	normal
109	0.4	0.7	0.3	1	Chapter 7	easy
110	0.25	0.2	0.15	0.2	Chapter 7	normal
111	0.1	0.6	0.2	0.5	Chapter 7	easy
112	0.3	0.25	0.1	0.2	Chapter 7	easy
113	0.1	0.2	0.2	0.2	Chapter 7	normal

## Sheet: Open-VQA (expert)
GPT-4V-Expert 1	Bard-Expert 1	LLaVa-Expert 1	Qwen-VL-Expert 1	GPT-4V-Expert 2	Bard-Expert 2	LLaVa-Expert 2	Qwen-VL-Expert 2	GPT-4V-Expert 3	Bard-Expert 3	LLaVa-Expert 3	Qwen-VL-Expert 3	Chapter	difficulty
8	6	6	6	8	7	7	7	8	8	8	8	Chapter 2	easy
7	5	6	4	8	7	0	6	8	8	0	8	Chapter 2	normal
8	7	7	7	7	6	6	6	5	8	1	4	Chapter 2	normal
8	5	7	5	7	7	7	0	9	6	1	1	Chapter 2	normal
7	6	7	4	7	6	5	0	6	3	2	5	Chapter 2	normal
7	4	4	6	7	0	0	0	7	1	0	5	Chapter 2	hard
6	6	7	7	4	7	6	0	3	2	7	0	Chapter 2	normal
6	5	4	5	7	2	2	2	2	0	0	1	Chapter 2	hard
7	6	7	7	7	5	5	6	8	2	8	7	Chapter 2	easy
7	4	5	4	7	2	2	2	0	0	1	0	Chapter 2	hard
6	6	5	5	5	7	0	0	1	9	3	2	Chapter 2	hard
5	7	5	5	6	7	5	0	2	8	3	3	Chapter 2	normal
6	5	6	5	0	0	0	2	2	1	0	4	Chapter 2	hard
7	6	6	7	7	7	4	0	8	5	3	1	Chapter 2	normal
6	5	6	6	7	6	6	5	7	7	7	3	Chapter 2	normal
6	6	6	6	7	6	4	6	7	7	6	7	Chapter 2	normal
5	4	5	4	7	7	6	0	8	8	8	2	Chapter 2	normal
7	6	7	6	7	5	0	4	8	8	2	8	Chapter 2	normal
6	6	5	6	7	6	0	7	8	5	8	5	Chapter 2	normal
6	6	7	6	5	4	7	7	8	5	2	6	Chapter 2	normal
6	5	5	5	7	6	0	6	5	7	0	8	Chapter 2	normal
6	5	5	5	6	6	6	6	8	8	8	8	Chapter 2	easy
7	6	7	5	5	5	4	0	8	5	2	0	Chapter 2	normal
6	5	7	6	7	5	4	4	8	1	2	2	Chapter 2	normal
6	7	6	6	4	0	0	0	1	1	1	1	Chapter 2	hard
6	4	6	6	6	2	7	4	8	4	6	6	Chapter 2	normal
6	5	6	6	2	0	2	2	5	4	6	5	Chapter 2	hard
7	4	6	2	6	0	0	0	8	2	2	0	Chapter 2	hard
6	5	6	5	6	0	3	0	2	1	0	0	Chapter 2	hard
7	5	3	5	7	7	0	4	8	9	0	7	Chapter 2	normal
7	6	7	7	4	4	4	4	1	0	4	0	Chapter 2	hard
7	5	4	5	4	4	0	4	2	0	0	2	Chapter 2	hard
7	5	7	6	0	0	0	0	2	2	2	0	Chapter 2	hard
7	5	7	5	4	4	0	0	6	9	0	2	Chapter 2	normal
7	4	6	4	2	2	4	4	9	1	9	9	Chapter 2	normal
6	3	6	3	2	2	0	2	2	1	0	0	Chapter 2	hard
7	5	7	7	4	0	2	0	1	0	0	0	Chapter 2	hard
8	3	3	4	0	0	0	0	1	1	1	1	Chapter 2	hard
7	3	5	6	0	7	0	0	1	0	1	0	Chapter 2	hard
7	4	3	6	7	3	0	6	9	1	0	9	Chapter 2	normal
7	6	7	6	5	6	3	4	9	8	9	9	Chapter 2	easy
7	7	7	6	6	7	6	5	8	8	5	8	Chapter 4	easy
7	4	4	6	4	7	5	5	5	6	5	5	Chapter 4	normal
7	6	7	6	5	7	6	5	8	8	8	8	Chapter 4	easy
7	6	6	6	6	6	4	4	5	3	1	2	Chapter 4	normal
7	3	3	5	4	0	0	0	2	1	0	0	Chapter 4	hard
7	5	7	7	5	7	0	0	8	8	0	2	Chapter 4	normal
7	7	7	6	7	4	4	0	7	8	3	8	Chapter 4	normal
6	6	6	5	5	5	0	0	2	7	2	2	Chapter 4	hard
7	3	6	6	5	0	5	6	5	7	8	7	Chapter 4	normal
6	6	7	5	7	7	6	5	7	7	7	4	Chapter 4	normal
8	4	5	6	7	0	4	0	8	0	8	0	Chapter 4	normal
7	6	7	6	5	0	0	0	5	1	0	1	Chapter 4	hard
7	6	6	6	6	7	4	5	8	8	7	8	Chapter 4	easy
7	5	7	7	6	7	6	7	8	8	8	8	Chapter 4	easy
7	6	7	5	6	5	7	5	8	6	8	8	Chapter 4	easy
7	5	7	3	6	5	4	0	2	2	2	1	Chapter 4	hard
7	6	7	7	7	6	6	4	8	7	7	7	Chapter 4	easy
6	4	5	5	0	0	0	0	3	6	3	3	Chapter 4	hard
7	5	7	4	7	7	6	3	8	7	7	8	Chapter 4	easy
7	7	8	7	7	7	7	6	3	6	6	6	Chapter 4	easy
7	7	8	6	5	5	5	4	8	1	8	2	Chapter 4	normal
7	4	6	7	7	0	0	3	8	3	8	8	Chapter 4	normal
7	3	6	6	6	0	0	2	8	4	0	1	Chapter 5	hard
7	5	5	5	7	6	5	7	8	8	8	8	Chapter 5	easy
6	7	5	5	7	7	0	5	8	8	8	8	Chapter 5	normal
7	6	7	7	6	6	6	6	8	8	8	6	Chapter 5	easy
6	6	5	5	6	6	6	6	5	8	7	5	Chapter 5	normal
7	5	5	2	7	7	7	0	8	8	7	2	Chapter 5	normal
5	6	6	4	7	7	7	7	8	8	7	5	Chapter 5	easy
6	5	4	6	7	7	0	7	8	8	8	8	Chapter 5	normal
7	5	6	5	7	4	4	4	9	5	4	7	Chapter 5	normal
7	7	6	7	7	6	6	6	8	8	6	6	Chapter 5	easy
7	5	6	6	7	7	7	7	8	8	8	8	Chapter 5	easy
7	5	7	7	8	7	7	7	8	8	8	8	Chapter 5	easy
6	5	7	5	8	7	7	7	8	8	8	6	Chapter 5	easy
7	6	6	6	7	0	0	0	5	8	2	5	Chapter 5	normal
6	6	3	6	7	6	0	7	8	7	0	8	Chapter 5	normal
6	4	6	4	7	6	5	0	7	5	6	3	Chapter 5	normal
7	5	5	5	5	7	6	6	8	4	8	8	Chapter 5	normal
7	4	6	7	8	0	0	0	8	0	0	3	Chapter 5	hard
7	3	6	5	7	0	5	5	4	3	3	2	Chapter 5	normal
6	3	3	5	7	2	0	2	8	6	3	3	Chapter 6	hard
7	6	6	7	7	4	4	5	8	6	6	6	Chapter 6	normal
8	5	5	6	7	6	5	6	8	7	6	8	Chapter 6	easy
5	3	3	5	0	6	3	7	2	0	3	8	Chapter 6	hard
6	4	4	4	7	6	0	5	5	2	0	1	Chapter 6	hard
7	6	6	6	7	6	6	6	8	8	7	8	Chapter 6	easy
4	4	4	4	7	7	5	7	7	7	6	6	Chapter 6	normal
7	7	5	4	6	7	5	6	8	8	3	6	Chapter 6	normal
7	6	5	6	7	7	6	5	8	8	6	6	Chapter 6	easy
5	5	6	5	7	6	4	7	4	7	6	7	Chapter 6	normal
7	7	5	6	7	5	6	5	8	8	6	4	Chapter 6	easy
6	4	5	5	5	6	5	0	4	3	3	2	Chapter 6	hard
6	6	6	6	7	7	6	7	8	8	8	7	Chapter 6	easy
6	6	6	5	0	7	6	6	0	7	7	7	Chapter 6	normal
5	5	4	5	0	7	2	4	0	7	7	7	Chapter 6	normal
7	8	7	6	7	4	5	2	8	7	4	4	Chapter 6	normal
7	6	3	5	5	6	0	5	8	8	0	4	Chapter 6	normal
4	5	5	4	7	3	0	3	8	8	4	3	Chapter 6	normal
6	6	6	5	7	7	6	5	5	6	7	7	Chapter 6	normal
6	7	5	5	5	4	4	4	8	7	6	6	Chapter 6	normal
6	6	6	5	0	0	0	0	0	7	7	7	Chapter 6	hard
7	5	6	7	7	6	6	5	8	4	3	4	Chapter 6	normal
7	5	7	6	7	7	7	7	8	8	8	8	Chapter 7	easy
6	5	6	3	5	5	5	4	7	5	7	6	Chapter 7	normal
6	5	5	6	7	7	6	5	8	8	8	5	Chapter 7	easy
5	4	4	6	6	6	5	7	8	7	8	8	Chapter 7	normal
7	7	7	5	7	6	7	7	8	8	8	7	Chapter 7	easy
7	6	5	6	7	7	0	6	8	8	0	6	Chapter 7	normal
6	6	5	6	7	7	6	6	8	8	6	8	Chapter 7	easy
7	7	6	6	7	7	6	5	7	8	5	7	Chapter 7	easy
6	6	6	5	6	6	6	5	3	9	8	6	Chapter 7	normal
