# Supplementary material for: Evaluating the performance of large language &amp; visual-language models in cervical cytology screening
Source: Research Square preprint supplement (doi:10.21203/rs.3.rs-5849716/v1), 2025-04-15
Supplement: Supplementary file 4 [file e97e7be7c4aff4a58a2c7218.xlsx]

## Sheet: Fig. 1(c)
Layer 1	Count	Layer 2	Count	Layer 3	Count
What	350	is	108	the	202
How	59	does	53	of	43
In	16	are	52	do	13
Where	11	do	44	Atypical	12
Which	11	kind	22	does	10
When	7	may	16	are	9
Why	4	type	16	features	9
etc	11	can	15	a	7
		what	9	be	6
		features	7	characteristic	6
		characterizes	6	etc	152
		cytological	6
		etc	115

## Sheet: Fig. 1(d)
Chapter	Section	Knowledge point numbers
Endometrial Cells	Background	3
Endometrial Cells	Criteria	15
Endometrial Cells	Explanatory	18
Atypical Squamous Cells	Background	4
Atypical Squamous Cells	Criteria	15
Atypical Squamous Cells	Definition	12
Atypical Squamous Cells	Explanatory	20
Epithelial Cell Abnormalities	Criteria	44
Epithelial Cell Abnormalities	Table	11
Epithelial Cell Abnormalities	Problematic	117
Epithelial Abnormalities	Criteria	69
Epithelial Abnormalities	Definition	4
Epithelial Abnormalities	Explanatory	53
Epithelial Abnormalities	Problematic	7
Epithelial Abnormalities	Table	32

## Sheet: Fig. 1(e)
Length	Close-Ended-QA-Question Times	Close-Ended-VQA-Question Times	Open-Ended-QA-Question Times	Open-Ended-VQA-Question Times
1	0	0	0	0
2	0	0	0	0
3	0	0	1	0
4	1	0	2	0
5	7	0	5	3
6	5	1	11	0
7	15	10	33	4
8	31	11	29	10
9	29	11	34	5
10	29	12	37	20
11	27	31	35	16
12	34	42	25	8
13	30	27	23	13
14	32	36	25	12
15	31	22	24	9
16	24	16	13	8
17	13	21	17	0
18	14	19	6	3
19	17	10	5	0
20	8	6	4	2
21	18	4	4	0
22	7	9	2	0
23	6	6	1	0
24	3	3	5	0
25	8	1	3	0
26	3	3	1	0
27	2	2	4	0
28	4	1	1	0
29	3	2	1	0
30	5	0	0	0
31	2	1	1	0
32	4	0	0	0
33	1	0	1	0
34	0	0	0	0
35	1	0	0	0
36	1	0	1	0
37	1	0	1	0
38	1	0	1	0
44	0	0	0	0
46	0	0	0	0
53	0	0	0	0
56	0	0	0	0
57	0	0	0	0
73	0	0	0	0

## Sheet: Fig. 1(f)
Length	Open-Ended-QA-Answer Times	Open-Ended-VQA-Answer Times
1	6	15
2	5	5
3	10	9
4	9	6
5	8	6
6	13	6
7	15	10
8	18	6
9	23	5
10	22	5
11	24	4
12	20	4
13	19	4
14	18	3
15	15	3
16	18	3
17	21	3
18	10	2
19	15	3
20	9	1
21	12	2
22	6	1
23	3	1
24	4	1
25	5	0
26	3	1
27	4	1
28	3	1
29	1	1
30	1	0
31	2	0
32	1	0
33	0	0
34	2	0
35	0	1
36	1	0
37	2	0
38	1	0
44	1	0
46	1	0
53	1	0
56	2	0
57	1	0
73	1	0

## Sheet: Fig. 1(g)
Term	Question_Frequency	Answer_Frequency	Total_Frequency
squamous	226	142	368
endocervical	132	133	265
cell	132	115	247
endometrial	107	97	204
lesion	151	46	197
atypical	84	109	193
hsil	91	96	187
adenocarcinoma	85	71	156
chromatin	62	93	155
cytoplasmic	52	69	121
cytoplasm	49	67	116
carcinoma	62	31	93
nucleoli	52	36	88
lsil	40	40	80
tumor	34	28	62
hyperchromasia	26	34	60
metaplasia	23	32	55
nucleus	23	24	47
reactive	15	27	42
benign	10	19	29
cytological	2	26	28
atrophic	9	18	27
membrane	12	13	25
invasive	14	7	21
nonkeratinizing	10	11	21
keratinizing	7	13	20
inflammatory	8	9	17
endometrium	5	10	15
malignant	15	0	15
inflammation	7	6	13
parakeratosis	4	8	12
hpv	6	5	11
cytology	6	4	10
mitoses	5	5	10
necrosis	7	3	10
nilm	2	8	10
polymorphonuclear	4	2	6
atypia	4	2	6
virus	5	0	5
infection	3	2	5
metastasis	2	2	4
bacteria	2	2	4
diagnosis	1	2	3
agc	1	2	3
endocervix	1	2	3
hyperplasia	2	0	2
hyperkeratosis	1	1	2
ascus	1	0	1
disease	1	0	1
lymphoma	1	0	1
